# Supplementary material for: Aspergillus niger membrane-associated proteome analysis for the identification of glucose transporters
Source: PubMed Central journal article supplement (PMC4574540; doi:10.1186/s13068-015-0317-9), 2015-09-17
Supplement: 13068_2015_317_MOESM1_ESM.pdf [file 13068_2015_317_MOESM1_ESM.pdf]

## Results colour-coded for transmembrane structure

The current colourscheme of the alignment is for **transmembrane structure type**.

The transmembrane structure for each sequence is represented by a colour. If a sequence in the alignment has no colours assigned, this means that no prediction was possible for that sequence (if this was requested).

The colour assignment is:

**TM SEGMENT (T)** You have selected to perform transmembrane structure prediction using **TMHMM v2.0** (Krogh et. al. 2001).

|                        | ..... 10    | ..... 20   | ..... 30     | ..... 40   | ..... 50    |
|------------------------|-------------|------------|--------------|------------|-------------|
| (PRED) Q8VZ80_Arabidop | -----       | -----      | -----        | -----      | -----       |
| (PRED) G1UB10_Candida  | -----       | -----      | -----        | -----      | -----       |
| (PRED) Q5B0S0_Emericel | -----       | -----      | -----        | -----      | -----MGV    |
| (PRED) P13181_Saccharo | -----       | -----      | ---MAVE---   | ENNMPVVSQQ | PQAGEDVISS  |
| (PRED) P40886_Saccharo | -----       | -----      | ---MTDR---   | KTNLPEEPIF | EEAEDDGCPs  |
| (PRED) P32465_Saccharo | -----       | -----      | -----        | --MNSTPDLI | SPQKSNSNS   |
| (PRED) P32466_Saccharo | -----       | -----      | -----        | --MNSTPDLI | SPQKSSENSN  |
| (PRED) P39003_Saccharo | -----       | -----      | -----        | --MSQDAAIA | EQTPVEHLSA  |
| (PRED) P39004_Saccharo | -----       | -----      | -----        | --MSQDAAIA | EQTPVEHLSA  |
| (PRED) P32467_Saccharo | -----       | -----      | ---MSEE---   | AAYQEDTAVQ | NTPADALSPV  |
| (PRED) P38695_Saccharo | -----MS     | ELENAHQGPL | EGSATVS---   | TNSNSYNEKS | GNSTAPGTAG  |
| (PRED) P54862_Saccharo | -----       | -----      | -----        | -----MSGV  | NNTSANELST  |
| (PRED) P40885_Saccharo | -----       | -----      | -----        | -----MSGV  | NNTSANDLST  |
| (PRED) P39924_Saccharo | -----       | -----      | -----        | -----      | MSSAQSSIDS  |
| (PRED) P53631_Saccharo | -----       | -----      | -----        | -----      | MQSSTESDRD  |
| (PRED) P54854_Saccharo | -----       | -----      | -----        | -----MAS   | EQSSPEINAD  |
| (PRED) P47185_Saccharo | -----       | -----      | -----        | -----MAS   | EQSSPEINAD  |
| (PRED) P10870_Saccharo | MDPNSNSSSE  | TLRQEKQGFL | DKALQRVKG I  | ALRRNNSNKD | HTTDDTTGSI  |
| (PRED) P43581_Saccharo | -----       | -----      | -----        | -----      | -----MV     |
| (PRED) P23585_Saccharo | -----       | -----      | -----        | -----      | -MSEFATSRV  |
| (PRED) O74849_Schizosa | -----       | -----      | -----        | -----      | -----       |
| (PRED) P15325_Emericel | -----       | -----      | -----        | -----      | -----       |
| (PRED) Q59TA4_Candida  | -----       | -----      | -----        | -----      | -----       |
| (PRED) Q59TK2_Candida  | -----       | -----      | -----        | -----      | -----       |
| (PRED) Q8L6Z8_Arabidop | -----       | -----      | -----        | -----      | -----       |
| (PRED) Q94AZ2_Arabidop | -----       | -----      | -----        | -----      | -----       |
| (PRED) Q8BFW9_Mus_musc | -----       | -----      | -----        | -----      | -----       |
| (PRED) Q7KWJ5_Plasmodi | -----       | -----      | -----        | -----      | -----       |
| (PRED) O44827_Caenorha | -----       | -----      | -----        | -----      | -----       |
| (PRED) P11166_Homo_sap | -----       | -----      | -----        | -----      | -----       |
| (PRED) P11167_Rattus_n | -----       | -----      | -----        | -----      | -----       |
| (PRED) P17809_Mus_musc | -----       | -----      | -----        | -----      | -----       |
| (PRED) P14142_Mus_musc | -----       | -----      | -----        | -----      | -----       |
| (PRED) P19357_Rattus_n | -----       | -----      | -----        | -----      | -----       |
| (PRED) P14246_Mus_musc | -----       | -----      | -----        | -----      | -----       |
| (PRED) P12336_Rattus_n | -----       | -----      | -----        | -----      | -----       |
| (PRED) P11168_Homo_sap | -----       | -----      | -----        | -----      | -----       |
| (PRED) P32037_Mus_musc | -----       | -----      | -----        | -----      | -----       |
| (PRED) Q07647_Rattus_n | -----       | -----      | -----        | -----      | -----       |
| (PRED) P43427_Rattus_n | -----       | -----      | -----        | -----      | -----       |
| (PRED) Q9JIF3_Mus_musc | -----       | -----      | -----        | -----      | -----       |
| (PRED) Q8K4S3_Rattus_n | MIPPAGS---  | ---TPPGEAL | IPSVAPQ---   | DFWRSPISGY | SGSVTRHISH  |
|                        | ..... 60    | ..... 70   | ..... 80     | ..... 90   | ..... 100   |
| (PRED) Q8VZ80_Arabidop | -----       | -MTGATPENR | TAPSPPPVKH   | VPESVLPAPK | PKRNNYAFAC  |
| (PRED) G1UB10_Candida  | -----       | -----      | -MSANIQALM   | KSYVNFDEHT | SGSAARGILI  |
| (PRED) Q5B0S0_Emericel | DIKGLFKPKA  | EQQEHSQATT | PSRTDSIAEK   | DNGIIDDSPV | KYLTWRSFIL  |
| (PRED) P13181_Saccharo | LSKDSHLSAQ  | SQKYSNDELK | AGESGSEGSQ   | SVPIEIPKKP | MSEYVTVSLL  |
| (PRED) P40886_Saccharo | IENSSHLSVP  | TVEENKDF-- | ---SEYNGEE   | AEEVVVPEKP | ASAYATVSIM  |
| (PRED) P32465_Saccharo | YELESGRSKA  | MNTPEGKNES | FHDNLSESQV   | QPAVAPPNTG | KGVYVTVSIC  |
| (PRED) P32466_Saccharo | ADLPSNSSQV  | MNMPEEKGV- | --QDDFQAEA   | DQVLTNPNTG | KGAYVTVSIC  |
| (PRED) P39003_Saccharo | VDSASHSVLS  | TPSNKAERDE | IKAYGEGEEH   | EPVVEIPKRP | ASAYVTVSIC  |
| (PRED) P39004_Saccharo | VDSASHSVLS  | TPSNKAERDE | IKAYGEGEEH   | EPVVEIPKRP | ASAYVTVSIC  |
| (PRED) P32467_Saccharo | ESDSNSALST  | PSNKAERDDM | KDFDENHEES   | NNYVEIPKKP | ASAYVTVSIC  |
| (PRED) P38695_Saccharo | YNDNLAQAKP  | VSSYISHEGP | PKDELEELQK   | EVDKQLEKKS | KSDLLFVSVC  |
| (PRED) P54862_Saccharo | TMSNSNSAVG  | APSVKTEHGD | SKNSLNLNLDAN | EPPIDLPOKP | LSAYTTVAIL  |
| (PRED) P40885_Saccharo | TESNSNSVAN  | APSVKTEHND | SKNSLNLNLDAT | EPPIDLPOKP | LSAYTTVAIL  |
| (PRED) P39924_Saccharo | DGDVRDADIH  | VAPPVEKEWS | DGFDDNEVIN   | GDNVEPPKRG | LIGYLVIIYLL |
| (PRED) P53631_Saccharo | IQDGPDADIH  | VAPPVEKEWS | DGFDDNEVIN   | GDNVEPPKRG | LIGYLVIIYLL |
| (PRED) P54854_Saccharo | NLNSSAADVH  | VQPPGEKEWS | DGFYDKEVIN   | GNTPDAPKRG | FLGYLIIYLL  |
| (PRED) P47185_Saccharo | NLNSSAADVH  | VQPPGEKEWS | DGFYDKEVIN   | GNTPDAPKRG | FLGYLIIYLL  |
| (PRED) P10870_Saccharo | RTPTS LQRQN | SDRQSNMTSV | FTDDISTIDD   | NSILFSEPPQ | KQSMMSICV   |
| (PRED) P43581_Saccharo | SSSVSILGTS  | AKASTSLSRK | DEIKLTPETR   | EASLDIPYKP | IIAYWTVMGL  |

```
(PRED) P23585_Saccharo ESGSQQTSIH STPIVQKLET DESPIQTKSE YTNAELPAKP IAAYWTVICL
(PRED) O74849_Schizosa ----- -MAKILTIVM
(PRED) P15325_Emericel -----MSIL ALVEDRPTPR EVYNWRVYLL
(PRED) Q59TA4_Candida -----MS SKIERIFSGP ALKINTYLDK LPKIYNVFFI
(PRED) Q59TK2_Candida -----MS SKIERIFSGP ALKINTYLDK LPKIYNVFFI
(PRED) Q8L6Z8_Arabidop MGFDPENQSI SSVGQVVGDS SSGGITAEKE PLLKENHSPE NYSVLA AIPP
(PRED) Q94AZ2_Arabidop -----MTGGGF ATSANGVEFE AKITPIVIIS
(PRED) Q8BFW9_Mus_musc ---MVPVENT EGPNLLNQKG REAETEGSCG ASGGGHPACA GGPSMFTFLT
(PRED) Q7KWJ5_Plasmodi -----MTKSSKDIC SENEGKKNKG SGFFSTSFKY
(PRED) O44827_Caenorha MSEKSRSDTS ATASLSDSSK SPSSYSTPGT TTQKIIFPDG KLTKCLAFSA
(PRED) P11166_Homo_sap -----MEPSSK KLTGRMLLAV
(PRED) P11167_Rattus_n -----MEPSSK KVTGRMLLAV
(PRED) P17809_Mus_musc -----MDPSSK KVTGRMLLAV
(PRED) P14142_Mus_musc -----MPSGFQQI GSDDGEPFRQ RVTGTLVLAV
(PRED) P19357_Rattus_n -----MPSGFQQI GSEDDGEPQQ RVTGTLVLAV
(PRED) P14246_Mus_musc -----MSED KITGTLAFTV
(PRED) P12336_Rattus_n -----MSED KITGTLAFTV
(PRED) P11168_Homo_sap -----MTED KVTGTLVFTV
(PRED) P32037_Mus_musc -----MGTT KVTPSLVFAV
(PRED) Q07647_Rattus_n -----MGTA KVTPSLVFAV
(PRED) P43427_Rattus_n -----MEKEDQKGTG KLTLVLALAT
(PRED) Q9JIF3_Mus_musc -----MSPEDPQET QPLLRPPEAR TPRGRRVFLA
(PRED) Q8K4S3_Rattus_n RANNFKRHPK RRKYIRPS-- P P P P P N T P C P I E L V D F E D L H P Q R S F W E L L F
```

```
..... 110 ..... 120 ..... 130 ..... 140 ..... 150
(PRED) Q8VZ80_Arabidop AILASMTSIL LGYDIGVMSG AM----IYIK RD-----L-----
(PRED) G1UB10_Candida GMFAAFGGFL FGYDTGTISG VLSM-DYVKA RF-----P-----N--
(PRED) Q5B0S0_Emericel GIVVSMGGFI FGYSTGQISG FTTM-ADFKK RF-----AE-RQ-AN--
(PRED) P13181_Saccharo CLCVAFGGFM FGWDTGTISG FVVQ-TDFLR RF-----GM-KH-KD--
(PRED) P40886_Saccharo CLCMAFGGFM SGWDTGTISG FVNQ-TDFLR RF-----GNYSH-SK--
(PRED) P32465_Saccharo CVMVAFGGFI FGWDTGTISG FVAQ-TDFLR RF-----GM-KH-HD--
(PRED) P32466_Saccharo CVMVAFGGFV FGWDTGTISG FVAQ-TDFLR RF-----GM-KH-KD--
(PRED) P39003_Saccharo CIMIAFGGFV FGWDTGTISG FINQ-TDFIR RF-----GM-KH-KD--
(PRED) P39004_Saccharo CIMIAFGGFV FGWDTGTISG FINQ-TDFIR RF-----GM-KH-KD--
(PRED) P32467_Saccharo CLMVAFGGFV FGWDTGTISG FVAQ-TDFIR RF-----GM-KH-HD--
(PRED) P38695_Saccharo CLMVAFGGFV FGWDTGTISG FVRQ-TDFIR RF-----GS-TR-AN--
(PRED) P54862_Saccharo CLMIAFGGFI FGWDTGTISG FVNL-SDFIR RF-----GQ-KN-DK--
(PRED) P40885_Saccharo CLMIAFGGFI FGWDTGTISG FVNL-SDFIR RF-----GQ-KN-DK--
(PRED) P39924_Saccharo CYPISFGGFL PGWDSGITAG FINM-DNFKM NF-----GSYKH-ST--
(PRED) P53631_Saccharo CYPISFGGFL PGWDSGITAG FINM-DNFKM NF-----GSYKH-ST--
(PRED) P54854_Saccharo CYPVSFGGFL PGWDSGITAG FINM-DNFKM NF-----GSYKH-ST--
(PRED) P47185_Saccharo CYPVSFGGFL PGWDSGITAG FINM-DNFKM NF-----GSYKH-ST--
(PRED) P10870_Saccharo GVFVAVGGFL FGYDTGLINS ITSM-NYVKS HV-----A-----P--
(PRED) P43581_Saccharo CLMIAFGGFI FGWDTGTISG FINQ-TDFKR RF-----GE-LQ-RD--
(PRED) P23585_Saccharo CLMIAFGGFV FGWDTGTISG FVNQ-TDFKR RF-----GQ-MK-SD--
(PRED) O74849_Schizosa LVFVSMAGWM FGADTGSIGG ITNM-RDFQS RY-----ADRYDPVT--
(PRED) P15325_Emericel AAVASFTSCM IGYDSAFIGT T L S L - Q S F Q N E F ----- N W -----
(PRED) Q59TA4_Candida ASISTIAGMM FGF DISSMSA FIGA-EHYMR YF-----N-----
(PRED) Q59TK2_Candida ASISTIAGMM FGF DISSMSA FIGA-EHYMR YF-----N-----
(PRED) Q8L6Z8_Arabidop FLFPALGALL FGYEIGATSC AIMS-LKSPT LS-----G-----I--
(PRED) Q94AZ2_Arabidop CIMAATGGLM FGYDVGVS GG VTSM-PDFLE KFFFPVVYRKV VAGADKDS--
(PRED) Q8BFW9_Mus_musc SVTAAISGLL VGYELGLISG ALLQ-IRTL AL-----
(PRED) Q7KWJ5_Plasmodi VLSACIASFI FGYQVSVLNT IKNF-IVVEF EW-----CKGEKDR--
(PRED) O44827_Caenorha FVITL-ASFQ FGYHIGCVNA PGGLITEWII GSHKDLFDKE -----
(PRED) P11166_Homo_sap GGAVL-GSLQ FGYNTGVINA POKVIEEFYN QTWVHRYGES -----
(PRED) P11167_Rattus_n GGAVL-GSLQ FGYNTGVINA POKVIEEFYN QTWNHRYGES -----
(PRED) P17809_Mus_musc GGAVL-GSLQ FGYNTGVINA POKVIEEFYN QTWNHRYGEP -----
(PRED) P14142_Mus_musc FSAVL-GSLQ FGYNIGVINA POKVIEQSYN ATWLGRQGP GPD S-----
(PRED) P19357_Rattus_n FSAVL-GSLQ FGYNIGVINA POKVIEQSYN ATWLGRQGP GPD S-----
(PRED) P14246_Mus_musc FTAVL-SSFQ FGYDIGVINA PQEVIISHYR HVLGVPLDDR KAAINYDVNG
(PRED) P12336_Rattus_n FTAVL-GSFQ FGYDIGVINA PQEVIISHYR HVLGVPLDDR RATINYDING
(PRED) P11168_Homo_sap ITAVL-GSFQ FGYDIGVINA PQQVIISHYR HVLGVPLDDR KAINNYVINS
(PRED) P32037_Mus_musc TVATI-GSFQ FGYNTGVINA PETILKDFLN YTLERLEDL -----
(PRED) Q07647_Rattus_n TVATI-GSFQ FGYNTGVINA PETI IKDFLN YTLERLEDL -----
(PRED) P43427_Rattus_n FLA AFGSS FQ YGYNVA AVNS PSEFMQQFYN DTY YDRNKEN -----
(PRED) Q9JIF3_Mus_musc SFAAALGPLS FGFALGYSSP AIPSLRRTAP PA-----
(PRED) Q8K4S3_Rattus_n NGCILFG-IE FSY-----AM ETAYVTPVLL QM-----
```

```
..... 160 ..... 170 ..... 180 ..... 190 ..... 200
(PRED) Q8VZ80_Arabidop -----KIN DLQIGILAGS LNIYSLIGSC
(PRED) G1UB10_Candida -----NKTDFT SGESSLIVSI LSVGTFVGS L
(PRED) Q5B0S0_Emericel -----GEYVFS NVRNGLIVGL LCIGTMIGAL
(PRED) P13181_Saccharo -----GTHYLS NVRTGLIVAI FNIGCAFGGI
(PRED) P40886_Saccharo -----NTYYLS NVRTGLIVSI FNVGSAIGCL
(PRED) P32465_Saccharo -----GSHYLS KVRTGLIVSI FNIGCAIGGI
```

```
(PRED) P32466_Saccharo -----G SYYLS KVRTGLIVSI FNIGCAIGGI
(PRED) P39003_Saccharo -----G TNYLS KVRTGLIVSI FNIGCAIGGI
(PRED) P39004_Saccharo -----G TNYLS KVRTGLIVSI FNIGCAIGGI
(PRED) P32467_Saccharo -----G TYYLS KVRTGLIVSI FNIGCAIGGI
(PRED) P38695_Saccharo -----G TTYLS DVRTGLMVSI FNIGCAIGGI
(PRED) P54862_Saccharo -----G TYYLS KVRMGLIVSI FNIGCAIGGI
(PRED) P40885_Saccharo -----G TYYLS KVRMGLIVSI FNIGCAIGGI
(PRED) P39924_Saccharo -----G EYYLS NVRMGLLVAM FSIGCAIGGL
(PRED) P53631_Saccharo -----G EYYLS NVRMGLLVAM FSIGCAIGGL
(PRED) P54854_Saccharo -----G EYYLS NVRMGLLVAM FSVGCSIGGV
(PRED) P47185_Saccharo -----G EYYLS NVRMGLLVAM FSVGCSIGGV
(PRED) P10870_Saccharo -----N HDSFT AQOMSILVSF LSLGTTFFGAL
(PRED) P43581_Saccharo -----G SFQLS DVRTGLIVGI FNIGCALGGL
(PRED) P23585_Saccharo -----G TYYLS DVRTGLIVGI FNIGCAFGLL
(PRED) O74849_Schizosa -----D TYSYS SARQGLLVGM VNTGTTVGCL
(PRED) P15325_Emericel -----E SLNT DLISANIVSL YQAGAFFGAL
(PRED) Q59TA4_Candida -----S PG SDIQGFITSS MALGSFFGSI
(PRED) Q59TK2_Candida -----S PG SNIQGFITSS MALGSFFGSI
(PRED) Q8L6Z8_Arabidop -----S WYDLS SVDVGIITSG SLYGALIGSI
(PRED) Q94AZ2_Arabidop -----N YCKYD NOGLOLFTSS LYLAGLTATF
(PRED) Q8BFW9_Mus_musc -----T CHEQEMVSS LLIGAFSLASL
(PRED) Q7KWJ5_Plasmodi -----L NCSNN TIQSSFLLAS VFIGAVLGC
(PRED) O44827_Caenorha -----L SRENA DLAWSVAVS FAVGGMIGGL
(PRED) P11166_Homo_sap -----I LP TTL TTLWLSVAI FSVGGMIGSF
(PRED) P11167_Rattus_n -----I P TTL TTLWLSVAI FSVGGMIGSF
(PRED) P17809_Mus_musc -----I P TTL TTLWLSVAI FSVGGMIGSF
(PRED) P14142_Mus_musc -----I P Q TTL TTLWALSVAI FSVGGMISSF
(PRED) P19357_Rattus_n -----I P Q TTL TTLWALSVAI FSVGGMISSF
(PRED) P14246_Mus_musc TDTPLTVTPA Y-TTPAPWDE EETEGSAHIV TMLWLSVSS FAVGGMVASF
(PRED) P12336_Rattus_n TDTPLIVTPA --HTTPDAWE EETEGSAHIV TMLWLSVSS FAVGGMVASF
(PRED) P11168_Homo_sap TDELPTISYS MNPKPTPWA EETVAAAQLI TMLWLSVSS FAVGGMTASF
(PRED) P32037_Mus_musc -----P SEGLL TALWSLCVAI FSVGGMIGSF
(PRED) Q07647_Rattus_n -----P REGLL TTLWSLCVAI FSVGGMIGSF
(PRED) P43427_Rattus_n -----I ESFTL TLLWSLTVSM FPFGGFIGSL
(PRED) Q9JIF3_Mus_musc -----L RL DNASWFGAV VTLGAAAGGI
(PRED) Q8K4S3_Rattus_n -----G LP DQLYSLVWFI SPILGFLLOP
```

```
..... 210 ..... 220 ..... 230 ..... 240 ..... 250
(PRED) Q8VZ80_Arabidop AAGRTSDW-- --IGRRYTIV LAGA- IFFAG AILMGLSP-- -NYAFLMFGR
(PRED) G1UB10_Candida_ IAPLFS DR-- --IGRRWTLI LSTLIVFNLG VLLQTVAT-- -EKKLLIAGR
(PRED) Q5B0S0_Emericel VAAPLADR-- --IGRKL SMS FWSI- IHIVG IIIQIATDS- -NWWQIAMGR
(PRED) P13181_Saccharo ILSKGGDM-- --YGRKKGLS IVVS- VYIVG IIIQIASIN- -KWYQYFIGR
(PRED) P40886_Saccharo FLSKLGDI-- --YGRKMGLI IVIV- VYVVG IVIQIASID- -KWYQYFIGR
(PRED) P32465_Saccharo VLA KLGDM-- --YGRRIGLI VVVV- IYTI G IIIQIASIN- -KWYQYFIGR
(PRED) P32466_Saccharo I LAKLGDM-- --YGRKMGLI VVVV- IYTI G IIIQIASIN- -KWYQYFIGR
(PRED) P39003_Saccharo I LSKLGDM-- --YGRKVGLI VVVV- IYTI G IIIQIASIN- -KWYQYFIGR
(PRED) P39004_Saccharo I LSKLGDM-- --YGRKVGLI VVVV- IYTI G IIIQIASIN- -KWYQYFIGR
(PRED) P32467_Saccharo I LAKLGDM-- --YGRKMGLI VVVV- IYTI G IIIQIASIN- -KWYQYFIGR
(PRED) P38695_Saccharo VLSKLGDM-- --YGRKIGLM TVVV- IYSIG IIIQIASID- -KWYQYFIGR
(PRED) P54862_Saccharo VLSKVGDI-- --YGRRIGLI TVTA- IYVVG ILIQITSIN- -KWYQYFIGR
(PRED) P40885_Saccharo VLSKVGDI-- --YGRRIGLI TVTA- IYVVG ILIQITSIN- -KWYQYFIGR
(PRED) P39924_Saccharo IFARLADT-- --LGRRLAIV IVVL- VYVVG AIIQISSNH- -KWYQYFVGK
(PRED) P53631_Saccharo IFARLADT-- --LGRRLAIV IVVL- VYVVG AIIQISSNH- -KWYQYFVGK
(PRED) P54854_Saccharo AFARLADT-- --LGRRLAIV IVVL- VYVVG AIIQISSNH- -KWYQYFVGK
(PRED) P47185_Saccharo AFARLADT-- --LGRRLAIV IVVL- VYVVG AIIQISSNH- -KWYQYFVGK
(PRED) P10870_Saccharo TAPFISDS-- --YGRKPTII FSTIFIFSIG NSLQVGAG-- -GITLLIVGR
(PRED) P43581_Saccharo TLGRLGDI-- --YGRKIGLM CVIL- VYVVG IVIQIASSD- -KWYQYFIGR
(PRED) P23585_Saccharo TLGRLGDM-- --YGRRIGLM CVVL- VYIVG IVIQIASSD- -KWYQYFIGR
(PRED) O74849_Schizosa LSSPLGDR-- --FGKRKCIM GWTL- VYITG VIVQLTTIP- -SWVQMMVAK
(PRED) P15325_Emericel FAYPIGHE-- --WGRRWGLM FSAL- IFFLG AGMMLGANGD RGLGLIYGGR
(PRED) Q59TA4_Candida_ ASSFVSEP-- --FGRRLSLL TCAF- FWMVG AAIQSSVQ-- -NRAQLIIGR
(PRED) Q59TK2_Candida_ ASSFVSEP-- --FGRRLSLL TCAF- FWMVG AAIQSSVQ-- -NRAQLIIGR
(PRED) Q8L6Z8_Arabidop VAFSVA DI-- --IGRRKELI LAAF- LYLVG AIVTVVAP-- -VFSILIGR
(PRED) Q94AZ2_Arabidop FASYTTRT-- --LGRRLTML IAGV- FFIIG VALNAGA Q-- -DLAMLIAGR
(PRED) Q8BFW9_Mus_musc TGGVLI DR-- --YGRRLAI I LSSC- LLGLG SLVLIMSL-- -SYTLLIMGR
(PRED) Q7KWJ5_Plasmodi FSGYLVQ-- --FGRRLSLL I IYN- FFFLV SILTSITH-- -HFHTILFAR
(PRED) O44827_Caenorha SSGWLADK-- --VGRRGALF YNNL- LALAA AALMGLAKSV GAYPMVILGR
(PRED) P11166_Homo_sap SVGLFVNR-- --FGRRNSML MMNL- LAFVS AVLMGFSKLG KSFEMLILGR
(PRED) P11167_Rattus_n SVGLFVNR-- --FGRRNSML MMNL- LAFVS AVLMGFSKLG KSFEMLILGR
(PRED) P17809_Mus_musc SVGLFVNR-- --FGRRNSML MMNL- LAFVA AVLMGFSKLG KSFEMLILGR
(PRED) P14142_Mus_musc LIGIISQW-- --LGRKRAML ANNV- LAVLG GALMGLANAA ASYEILILGR
(PRED) P19357_Rattus_n LIGIISQW-- --LGRKRAML ANNV- LAVLG GALMGLANAA ASYEILILGR
(PRED) P14246_Mus_musc FGGWLGDK-- --LGRIKAML AANS- LSLTG ALLMGCSKFG PAHALI IAGR
(PRED) P12336_Rattus_n FGGWLGDK-- --LGRIKAML AANS- LSLTG ALLMGCSKFG PAHALI IAGR
(PRED) P11168_Homo_sap FGGWLGDT-- --LGRIKAML VANI- LSLVG ALLMGFSKLG PSHILI IAGR
```

```
(PRED) P32037_Mus_musc SVGLFVNR-- --FGRRNSML LVNL-LAIIA GCLMGFAKIA ESVEMLILGR
(PRED) Q07647_Rattus_n SVGLFVNR-- --FGRRNSML LVNL-LAILG GCLMGFAKIA ESVEMLILGR
(PRED) P43427_Rattus_n MVGFLVNN-- --LGRKGALL FNNI-FSILP AILMGCSKIA KSFEI I IASR
(PRED) Q9JIF3_Mus_musc LGGWLLDR-- --AGRKLSLL LCTV-PFVTG FAVITAAR-- -DVWMLLGGR
(PRED) Q8K4S3_Rattus_n LLGAWSDRCT SRFGRRRPFI LVLAIGALLG LSLLLNGRDI GMALADTATN
```

```
..... 260 ..... 270 ..... 280 ..... 290 ..... 300
(PRED) Q8VZ80_Arabidop FIAGIGVGYA LMIAPVYTAE VSPASSRGFL NSF--PEVFI NAGIMLGYVS
(PRED) G1UB10_Candida AIAGTGVGLI SSVIPNYISE TTPKWARGAV TAS--YQWMI TWGLLIAACA
(PRED) Q5B0S0_Emericel WVAGLGVGAL SSVVPMYQSE AAPRQVRGAM ISA--FQLFV AFGIFISYII
(PRED) P13181_Saccharo IISGLGVGGI AVLCPMLISE IAPKHLRGTL VSC--YQLMI TAGIFLGYCT
(PRED) P40886_Saccharo IIAGIGAGSI SVLAPMLISE TAPKHIRGTL LAC--WQLMV TFAIFLGYCT
(PRED) P32465_Saccharo IISGLGVGGI TVLSPMLISE VAPSEMRGTL VSC--YQVMI TLGIFLGYCT
(PRED) P32466_Saccharo IISGLGVGGI AVLSPMLISE VAPKEMRGTL VSC--YQLMI TLGIFLGYCT
(PRED) P39003_Saccharo IISGLGVGGI AVLSPMLISE VSPKHLRGTL VSC--YQLMI TAGIFLGYCT
(PRED) P39004_Saccharo IISGLGVGGI AVLSPMLISE VSPKHLRGTL VSC--YQLMI TAGIFLGYCT
(PRED) P32467_Saccharo IISGLGVGGI AVLSPMLISE VSPKHIRGTL VSC--YQLMI TLGIFLGYCT
(PRED) P38695_Saccharo IISGLGVGGI TVLAPMLISE VSPKQLRGTL VSC--YQLMI TFGIFLGYCT
(PRED) P54862_Saccharo IISGLGVGGI AVLSPMLISE VAPKHIRGTL VQL--YQLMG TMGIFLGYCT
(PRED) P40885_Saccharo IISGLGVGGI AVLSPMLISE VAPKQIRGTL VQL--YQLMC TMGIFLGYCT
(PRED) P39924_Saccharo I IYGLGAGGC SVLCPMLLSE IAPTDLRGGL VSL--YQLNM TFGIFLGYCS
(PRED) P53631_Saccharo I IYGLGAGGC SVLCPMLLSE IAPTDLRGGL VSL--YQLNM TFGIFLGYCS
(PRED) P54854_Saccharo I IYGLGAGGC SVLCPMLLSE IAPTDLRGGL VSL--YQLNM TFGIFLGYCS
(PRED) P47185_Saccharo I IYGLGAGGC SVLCPMLLSE IAPTDLRGGL VSL--YQLNM TFGIFLGYCS
(PRED) P10870_Saccharo VISGIGIGAI SAVVPLYQAE ATHKSLRGAI IST--YQWAI TWGLLVSSAV
(PRED) P43581_Saccharo IVSGMGVGGV AVLSPTLISE ISPKHLRGTC VSF--YQLMI TLGIFLGYCT
(PRED) P23585_Saccharo IISGMGVGGI AVLSPTLISE TAPKHIRGTC VSF--YQLMI TLGIFLGYCT
(PRED) O74849_Schizosa IWTLGLGIGAL SVIAPGYQSE SSPPHIRGAI VTT--YQLFI TLGIFIAACI
(PRED) P15325_Emericel VLAGIGVGAG SNICPIYISE MAPPAIRGRL VGV--YELGW QIGGVVGFWI
(PRED) Q59TA4_Candida IISGIGVGF G SAVAPVYGA E LAPRKIRGLI GGM--FQFFV TLGIMIMFYL
(PRED) Q59TK2_Candida IISGIGVGF G SAVAPVYGA E LAPRKIRGLI GGM--FQFFV TLGIMIMFYL
(PRED) Q8L6Z8_Arabidop VTYGMGIGLT MHAAPMYIAE TAPSQIRGRM ISL--KEFST VLGVMVGGYGI
(PRED) Q94AZ2_Arabidop ILLGCGVGFA NQAVPLFLSE IAPTRIRGGL NIL--FQLNV TIGILFANLV
(PRED) Q8BFW9_Mus_musc VAIGVSI SLS SIATCVYIAE IAPQHRRGLL VSL--NELMI VTGILFAYIS
(PRED) Q7KWJ5_Plasmodi LLSGFGIGLV TVSVPMYISE MTHKDKKGAY GVM--HQLFI TFGIFVAVML
(PRED) O44827_Caenorha LIIGLNCGFS SALVPMFLTE ISPNNLRGML GSL--HQLLV TIAILVSQIF
(PRED) P11166_Homo_sap FIIGVYCGLT TGFVPMYVGE VSPTALRGAL GTL--HQLGI VVGILIAQVF
(PRED) P11167_Rattus_n FIIGVYCGLT TGFVPMYVGE VSPTALRGAL GTL--HQLGI VVGILIAQVF
(PRED) P17809_Mus_musc FIIGVYCGLT TGFVPMYVGE VSPTALRGAL GTL--HQLGI VVGILIAQVF
(PRED) P14142_Mus_musc FLIGAYSGLT SGLVPMYVGE IAPTHLRGAL GTL--NQLAI VIGILVAQVL
(PRED) P19357_Rattus_n FLIGAYSGLT SGLVPMYVGE IAPTHLRGAL GTL--NQLAI VIGILVAQVL
(PRED) P14246_Mus_musc SVSGLYCGLI SGLVPMYIGE IAPTTLRGAL GTL--HQLAL VTGILISQIA
(PRED) P12336_Rattus_n SVSGLYCGLI SGLVPMYIGE IAPTTLRGAL GTL--HQLAL VTGILISQIA
(PRED) P11168_Homo_sap SISGLYCGLI SGLVPMYIGE IAPTALRGAL GTF--HQLAI VTGILISQII
(PRED) P32037_Mus_musc LLIGIFCGLC TGFVPMYIGE VSPTALRGAF GTL--NQLGI VVGILVAQIF
(PRED) Q07647_Rattus_n LIIGIFCGLC TGFVPMYIGE VSPTALRGAF GTL--NQLGI VVGILVAQVF
(PRED) P43427_Rattus_n LLVGICAGIS SNVVPMYLGE LAPKNLRGAL GVV--PQLFI TVGILVAQLF
(PRED) Q9JIF3_Mus_musc LLTGLACGVA SLVAPVYISE IAYPAVRGLL GSC--VQLMV VTGILLAYVA
(PRED) Q8K4S3_Rattus_n HKWGILLTVC GVVLMDFSAD SADNPSHAYM MDVCGPVDQD RGLNIHALMA
```

```
..... 310 ..... 320 ..... 330 ..... 340 ..... 350
(PRED) Q8VZ80_Arabidop NLAFSNLP-- LK----- -VGWR-LMLG IGAVPSVI-- LAIGVLAMPE
(PRED) G1UB10_Candida NKG SQGRK-- DS----- -GSYR-IPIG IQFLWALI-- LGIGFLFLPE
(PRED) Q5B0S0_Emericel NYGTESIQ-- ST----- -ASWR-ITMG IGFAWPLI-- LGLGALFLPE
(PRED) P13181_Saccharo NYGTKSYS-- NS----- -VQWR-VPLG LCFAWSLF-- MIGALTLVPE
(PRED) P40886_Saccharo NYGTKTYS-- NS----- -VQWR-VPLG LCFAWAII-- MIGGMTFVPE
(PRED) P32465_Saccharo NFGTKNYS-- NS----- -VQWR-VPLG LCFAWALF-- MIGGMMFVPE
(PRED) P32466_Saccharo NFGTKNYS-- NS----- -VQWR-VPLG LCFAWALF-- MIGGMTFVPE
(PRED) P39003_Saccharo NFGTKNYS-- NS----- -VQWR-VPLG LCFAWALF-- MIGGMTFVPE
(PRED) P39004_Saccharo NFGTKNYS-- NS----- -VQWR-VPLG LCFAWALF-- MIGGMTFVPE
(PRED) P32467_Saccharo NYGTKTYT-- NS----- -VQWR-VPLG LGFAWALF-- MIGGMTFVPE
(PRED) P38695_Saccharo NFGTKNYS-- NS----- -VQWR-VPLG LCFAWSIF-- MIVGMTFVPE
(PRED) P54862_Saccharo NYGTKNYH-- NA----- -TQWR-VGLG LCFAWATF-- MVSGMMFVPE
(PRED) P40885_Saccharo NYGTKNYH-- NA----- -TQWR-VGLG LCFAWTTF-- MVSGMMFVPE
(PRED) P39924_Saccharo VYGTRKYD-- NT----- -AQWR-VPLG LCFLWALI-- IIIGMLLVPE
(PRED) P53631_Saccharo VYGTRKYD-- NT----- -AQWR-VPLG LCFLWTLI-- IIIGMLLVPE
(PRED) P54854_Saccharo VYGTRKYS-- NT----- -AQWR-IPVG LCFLWALI-- IIVGMLLVPE
(PRED) P47185_Saccharo VYGTRKYS-- NT----- -AQWR-IPVG LCFLWALI-- IIVGMLLVPE
(PRED) P10870_Saccharo SQGTHARN-- DA----- -SSYR-IPIG LQYVWSSF-- LAIGMFFLPE
(PRED) P43581_Saccharo NYGTKKYS-- NS----- -IQWR-VPLG LCFAWAIF-- MVIGMVMVPE
(PRED) P23585_Saccharo NYGTKDYS-- NS----- -VQWR-VPLG LNFAFAIF-- MIAGMLMVPE
(PRED) O74849_Schizosa NMGTHKYTTH PE----- -AQWR-VPIG INLLWGIL-- MFFGMLFLPE
(PRED) P15325_Emericel NYGVDETLAP SH----- -KQWI-IPFA VQLIPAGL-- LIIGALLIRE
(PRED) Q59TA4_Candida SFGLGHIN-- GV----- -ASFR-IAWG LQIVPGLC-- LFLGCFFIPE
(PRED) Q59TK2_Candida SFGLGHIN-- GV----- -ASFR-IAWG LQIVPGLC-- LFLGCFFIPE
```

```

(PRED) Q8L6Z8_Arabidop GSLWIT----VI----- -SGWR-YMYA TILPFPVI-- MGTGMCWLPA
(PRED) Q94AZ2_Arabidop NYGTAKIK--GG----- -WGWR-LSLG LAGIPALL-- LTVGALLVTE
(PRED) Q8BFW9_Mus_musc NYAFANI---S----- -NGWK-YMFG LVIPLGVL-- QAIAMYFLPP
(PRED) Q7KWJ5_Plasmodi GLAMGEGPKA DSTPLTSFA KLWWR-LMFL FPSVISLIGI LALVVFKEE
(PRED) O44827_Caenorha GLPHLLGT--GD----- --RWP-LIFA FTVVPAVL-- QLALLMLCPE
(PRED) P11166_Homo_sap GLDSIMGN--KD----- --LWP-LLLS IIFIPALL-- QCIVLPFCPE
(PRED) P11167_Rattus_n GLDSIMGN--AD----- --LWP-LLLS VIFIPALL-- QCILLPFCPE
(PRED) P17809_Mus_musc GLDSIMGN--AD----- --LWP-LLLS VIFIPALL-- QCILLPFCPE
(PRED) P14142_Mus_musc GLESM LGT--AT----- --LWP-LLLA LTVLPALL-- QLILLPFCPE
(PRED) P19357_Rattus_n GLESM LGT--AT----- --LWP-LLLA ITVLPALL-- QLLLLPFCPE
(PRED) P14246_Mus_musc GLSFILGN--QD----- --HWH-ILLG LSAVPALL-- QCLLLFCPE
(PRED) P12336_Rattus_n GLSFILGN--QD----- --YWH-ILLG LSAVPALL-- QCLLLFCPE
(PRED) P11168_Homo_sap GLEFILGN--YD----- --LWH-ILLG LSGVRAIL-- QSLLLFCPE
(PRED) P32037_Mus_musc GLDFILGS--EE----- --LWP-GLLG LTIIPAIL-- QSAALPFCPE
(PRED) Q07647_Rattus_n GLDFILGS--EE----- --LWP-GLLG LTIIPAIL-- QSAALPFCPE
(PRED) P43427_Rattus_n GLRSVLAS--EE----- --GWP-ILLG LTGVPAGL-- QLLLLPFFBE
(PRED) Q9JIF3_Mus_musc GWVL----- --EWR-WLAV LGCVPPTL-- MLLLMCYMPE
(PRED) Q8K4S3_Rattus_n GLGGGFGYVV GG----- -IHWDKTSFG RALGGQLRVI YIFTAITLSV

```

```

..... 360 ..... 370 ..... 380 ..... 390 ..... 400
(PRED) Q8VZ80_Arabidop SPRWLV MQGR L----- GDAKRVLDKT SD-SPTEATL RLEDIKHAAG
(PRED) G1UB10_Candida TPRYWVSKSE E----- TKAKDSL RRI RN-LPVDHPD -----
(PRED) Q5B0S0_Emericel SPRYAYRLGR I----- DEARKVMAKL YG-VEVNHRV -----
(PRED) P13181_Saccharo SPRYLCEVNK V----- EDAKRSIAKS NK-VSPEDPA -----
(PRED) P40886_Saccharo SPRFLVQVGK I----- EQAKASFAKS NK-LSVDDPA -----
(PRED) P32465_Saccharo SPRYLVEAGR I----- DEARASLAKV NK-CPPDHPY -----
(PRED) P32466_Saccharo SPRYLVEAGQ I----- DEARASLSKV NK-VAPDHPF -----
(PRED) P39003_Saccharo SPRYLAEVGK I----- EEAKRSIAVS NK-VAVDDPS -----
(PRED) P39004_Saccharo SPRYLAEVGK I----- EEAKRSIAVS NK-VAVDDPS -----
(PRED) P32467_Saccharo SPRYLVEVGK I----- EEAKRSIALS NK-VSADDPA -----
(PRED) P38695_Saccharo SPRYLVEVGK I----- EEAKRSLARA NK-TTEDSPL -----
(PRED) P54862_Saccharo SPRYLIEVGK D----- EEAKRSLSKS NK-VSVDDPA -----
(PRED) P40885_Saccharo SPRYLIEVGK D----- EEAKRSLSKS NK-VSVDDPA -----
(PRED) P39924_Saccharo SPRYLIECER H----- EEARASIAKI NK-VSPEDPW -----
(PRED) P53631_Saccharo SPRYLIECER H----- EEARASIAKI NK-VSPEDPW -----
(PRED) P54854_Saccharo SPRYLIECER H----- EEACVSI AKI NK-VSPEDPW -----
(PRED) P47185_Saccharo SPRYLIECER H----- EEACVSI AKI DK-VSPEDPW -----
(PRED) P10870_Saccharo SPRYVVLKDK L----- DEAAKSLSFL RG-VPVHDSG -----
(PRED) P43581_Saccharo SPRYLVEK GK Y----- EEARRSLAKS NK-VTVTDPG -----
(PRED) P23585_Saccharo SPRFLVEKGR Y----- EDAKRSIAKS NK-VTIEDPS -----
(PRED) O74849_Schizosa SPRYLAVKGR N----- EECMKILTRN AG-LPADHPI -----
(PRED) P15325_Emericel SPRWLF LRGN R----- EKG IETLAWI RN-LPADHIY -----
(PRED) Q59TA4_Candida SPRWLAKQGQ W----- EAAEEIVAKI QAHGDRENPD -----
(PRED) Q59TK2_Candida SPRWLAKQGQ W----- EAAEEIVAKI QAHGDRENPD -----
(PRED) Q8L6Z8_Arabidop SPRWLL LRAL QGQNGENLQ QAAIRSLCRL RG--SVIADS -----
(PRED) Q94AZ2_Arabidop TPNSLVERGR L----- DEGKAVLRRI RGTDN----- -----
(PRED) Q8BFW9_Mus_musc SPRFLVMK GQ E----- ESAGKVL RKL RV----ISD----- -----
(PRED) Q7KWJ5_Plasmodi TPYFLFEKGR I----- EESKNILKKI YE----TDN----- -----
(PRED) O44827_Caenorha SPKYTMAVRG Q-----R NEAESALKKL RDTED----- -----
(PRED) P11166_Homo_sap SPRFL LINRN E-----E NRAKSVLKKL RGTAD----- -----
(PRED) P11167_Rattus_n SPRFL LINRN E-----E NRAKSVLKKL RGTAD----- -----
(PRED) P17809_Mus_musc SPRFL LINRN E-----E NRAKSVLKKL RGTAD----- -----
(PRED) P14142_Mus_musc SPRYLYI I RN L-----E GPARKSLKRL TGWAD----- -----
(PRED) P19357_Rattus_n SPRYLYI I RN L-----E GPARKSLKRL TGWAD----- -----
(PRED) P14246_Mus_musc SPRYLYIKLE E-----E VRAKSLKRL RGTED----- -----
(PRED) P12336_Rattus_n SPRYLYLNLE E-----E VRAKSLKRL RGTED----- -----
(PRED) P11168_Homo_sap SPRYLYIKLD E-----E VKAKQSLKRL RGYDD----- -----
(PRED) P32037_Mus_musc SPRFL LINKK E-----E DQATEILQRL WGTSD----- -----
(PRED) Q07647_Rattus_n SPRFL LINRK E-----E DQATEILQRL WGTDP----- -----
(PRED) P43427_Rattus_n SPRYLLIQKK N-----E SAAEKALQTL RGWKD----- -----
(PRED) Q9JIF3_Mus_musc TPRFLLTQH Q Y----- QEAMAALRFL WG----- -----
(PRED) Q8K4S3_Rattus_n TTVFTLV SIP ERPL---RPL GEKRTAMKSP SLPLPPSPPV LLEEGAGDTL

```

```

..... 410 ..... 420 ..... 430 ..... 440 ..... 450
(PRED) Q8VZ80_Arabidop IPADCHDDVV QVSRNSHGE GVWRELLIRP --TPAV--RR VMIAAIGIHF
(PRED) G1UB10_Candida LVSEYDDIKA NFD FESKYAT SSWTQVFKN-- --VNKQ--HH RLFTGVAIQ A
(PRED) Q5B0S0_Emericel VVQEMKDMKD KLEEERAAGV APWHEVVTG- ---PRM--LY RTLLGIALQS
(PRED) P13181_Saccharo VQAEIDLIMA GIEAEKLAGN ASWGELFST- --KTKV--FQ RLLMGV FVQM
(PRED) P40886_Saccharo VVAEIDL LVA GVEAEEAMGT ASWKELFSR- --KTKV--FQ RLTM TVMINS
(PRED) P32465_Saccharo IQYELETIEA SVEEMRAAGT ASWGELFTG- --KPAM--FQ RTMMGIMI QS
(PRED) P32466_Saccharo IQQELEVIEA SVEEARAAGS ASWGELFTG- --KPAM--FK RTMMGIMI QS
(PRED) P39003_Saccharo VLAEVEAVLA GVEAEKLAGN ASWGELFSS- --KTKV--LQ RLIMGAMI QS
(PRED) P39004_Saccharo VLAEVEAVLA GVEAEKLAGN ASWGELFSS- --KTKV--LQ RLIMGAMI QS
(PRED) P32467_Saccharo VMAEVEVQA TVEAEKLAGN ASWGEIFST- --KTKV--FQ RLIMGAMI QS
(PRED) P38695_Saccharo VTLEMENYQS SIEAERLAGS ASWGELVTG- --KPQM--FR RTLMGMMI QS

```

```
(PRED) P54862_Saccharo LLVEYDTIKA GIELEKLAGN ASWSELLST- --KTKV--FQ RVLMGVMIQS
(PRED) P40885_Saccharo LLAEYDTIKA GIELEKLAGN ASWSELLST- --KTKV--FQ RVLMGVMIQS
(PRED) P39924_Saccharo VLKQADEINA GVLAQRELGE ASWKELFSV- --KTKV--LQ RLITGILVQT
(PRED) P53631_Saccharo VLKQADEINA GVLAQRELGE ASWKELFSV- --KTKV--LQ RLITGILVQT
(PRED) P54854_Saccharo VLKQADEINA GVLAQRELGE ASWKELFSV- --KTKV--LQ RLITGILVQT
(PRED) P47185_Saccharo VLKQADEINA GVLAQRELGE ASWKELFSV- --KTKV--LQ RLITGILVQT
(PRED) P10870_Saccharo LLEELVEIKA TYDYEASFGS SNFIDCFISS KSRPKQ--TL RMFTGIALQA
(PRED) P43581_Saccharo VVFEFDTIVA NMELERAVGN ASWHELFSN- --KGAI--LP RVIMGIVIQS
(PRED) P23585_Saccharo IVAEMDTIMA NVETERLAGN ASWGELFSN- --KGAI--LP RVIMGIMIQS
(PRED) O74849_Schizosa MQKEYNAIQA DVEAELAGGP CSWPQIFS- ---NEI--RY RTLLGMGVMA
(PRED) P15325_Emericel MVEEINMIEQ SLEQQRVKIG LGFWKPFKAA WTNKRI--LY RLFLGSMFLF
(PRED) Q59TA4_Candida VLIEISEIKD QLLLEESSKQ IGYATLFT-- ---KKY--IQ RTFTAIFAQI
(PRED) Q59TK2_Candida VLIEISEIKD QLLLEESSKQ IGYATLFT-- ---KKY--IQ RTFTAIFAQI
(PRED) Q8L6Z8_Arabidop AAEQVNEILA ELSLVGEDKE ATFGELFR-- ---GKC--LK ALTIAGGLVL
(PRED) Q94AZ2_Arabidop VEPEFADLLE ASRLAKEV-K HPFRNLLQ-- ---RRN--RP QLVIIVALQI
(PRED) Q8BFW9_Mus_musc TTEELTLIKS SLKDEYQY-- -SFWDLFRS- --KDNM--RT RILIGLTLVF
(PRED) Q7KWJ5_Plasmodi VDEPLNAIKE AVEQNESAKK NSLSLLSALK --IPSY--RY VIILGCLLSG
(PRED) O44827_Caenorha VSTEIEAMQE EATAAGVQEK PKMGDMFK-- ---GAL--LW PMSIAIMMML
(PRED) P11166_Homo_sap VTHDLQEMKE ESRQMMREKK VTILELFRS- ---PAY--RQ PILIAVVLQL
(PRED) P11167_Rattus_n VTRDLQEMKE EGRQMMREKK VTILELFRS- ---PAY--RQ PILIAVVLQL
(PRED) P17809_Mus_musc VTRDLQEMKE EGRQMMREKK VTILELFRS- ---PAY--RQ PILIAVVLQL
(PRED) P14142_Mus_musc VSDALAEKLD EKRLERERP MSLQLLGS- ---RTH--RQ PLIIAVVLQL
(PRED) P19357_Rattus_n VSDALAEKLD EKRLERERP LSLQLLGS- ---RTH--RQ PLIIAVVLQL
(PRED) P14246_Mus_musc VTKDINEMKK EKEEASTEOK VSVIQLFTD- ---ANY--RQ PILVALMLHM
(PRED) P12336_Rattus_n ITKDINEMRK EKEEASTEOK VSVIQLFTD- ---PNY--RQ PIVVALMLHL
(PRED) P11168_Homo_sap VTKDINEMRK EREEASSEOK VSIIQLFTN- ---SSY--RQ PILVALMLHV
(PRED) P32037_Mus_musc VVQEIQEMKD ESVRMSQEKQ VTVLELFRS- ---PNY--VQ PLLISIVLQL
(PRED) Q07647_Rattus_n VIQEIQEMKD ESIRMSQEKQ VTVLELFRS- ---PSY--FQ PLLISVVLQL
(PRED) P43427_Rattus_n VDMEMEEIRK EDEAEKAAGF ISVWKLFRM- ---QSL--RW QLISTIVLMA
(PRED) Q9JIF3_Mus_musc SEEGWEEPPV GAHQGF--- -QLALLRR-- ---PGI--YK PLIIGISLMV
(PRED) Q8K4S3_Rattus_n PSTTATSLYA SFSSPISPPS PLTPKYGSFI SRDSSLTGIN EFASSFGTSN
```

..... 460 ..... 470 ..... 480 ..... 490 ..... 500

```
(PRED) Q8VZ80_Arabidop FQQASGIDAV VLFSPRIFKT AGLKTDHQQL LATVAVGIVK TSFILVA-TF
(PRED) G1UB10_Candida LQQLTGINFI FYYGTQFFKR SGI---EDPF LIQLATNIVN VGMTVPG-I I
(PRED) Q5B0S0_Emericel LQQLSGANFI FYYGNSIFTS TGL---NNSY VTQIILGAVN FGMTLPG-LY
(PRED) P13181_Saccharo FQQLTGNNYF FYYGTVIFKS VGL---DSSF ETSIVIGVVN FASTFFS-LW
(PRED) P40886_Saccharo LQQLTGDNYF FYYGTTIFKS VGM---ND SF ETSIVLGIVN FASCFFS-LY
(PRED) P32465_Saccharo LQQLTGDNYF FYYGTIVFOA VGL---SDSF ETSIVFGVVN FFSTCCS-LY
(PRED) P32466_Saccharo LQQLTGDNYF FYYGTTVFNA VGM---SDSF ETSIVFGVVN FFSTCCS-LY
(PRED) P39003_Saccharo LQQLTGDNYF FYYGTTIFKA VGL---SDSF ETSIVLGIVN FASTFVG-IY
(PRED) P39004_Saccharo LQQLTGDNYF FYYGTTIFKA VGL---SDSF ETSIVLGIVN FASTFVG-IY
(PRED) P32467_Saccharo LQQLTGDNYF FYYGTTVFTA VGL---EDSF ETSIVLGIVN FASTFVG-IF
(PRED) P38695_Saccharo LQQLTGDNYF FYYGTTIFQA VGL---EDSF ETAIVLGIVN FVSTFFS-LY
(PRED) P54862_Saccharo LQQLTGDNYF FYYGTTIFKS VGL---KDSF QTSIIIGVVN FFSSFIA-VY
(PRED) P40885_Saccharo LQQLTGDNYF FYYGTTIFKS VGL---KDSF QTSIIIGVVN FFSSFIA-VY
(PRED) P39924_Saccharo FLQLTGGENYF FYYGTTIFKS VGL---TDGF ETSIVLGTVN FFSTIIA-VM
(PRED) P53631_Saccharo FLQLTGGENYF FYYGTTIFKS VGL---TDGF ETSIVLGTVN FFSTIIA-VM
(PRED) P54854_Saccharo FLQLTGGENYF FYYGTTIFKS VGL---TDGF ETSIVLGTVN FFSTIIA-VM
(PRED) P47185_Saccharo FLQLTGGENYF FYYGTTIFKS VGL---TDGF ETSIVLGTVN FFSTIIA-VM
(PRED) P10870_Saccharo FQQFSGINFI FYYGVNFFNK TGV---SNSY LVSFITYAVN VVFNVPG-LF
(PRED) P43581_Saccharo LQQLTGHCNYF FYYGTTIFNA VGM---QDSF ETSIVLGAVN FASTFVA-LY
(PRED) P23585_Saccharo LQQLTGNNYF FYYGTTIFNA VGM---KDSF QTSIVLGIVN FASTFVA-LY
(PRED) O74849_Schizosa FQQLTGNNYF FYYGTQVFRG TGL---NSPF LAALILDVN FGCTFGA-IF
(PRED) P15325_Emericel WQNGSGINAI NYYSRPFVKS IGVSGGNTSL LTTGIFGVV AVITFVWLLY
(PRED) Q59TA4_Candida WQQLTGMNVM MYYIVYIFQM AGYSG-NSNL VASSIQYVIN TCVTVPA-LY
(PRED) Q59TK2_Candida WQQLTGMNVM MYYIVYIFQM AGYSG-NSNL VASSIQYVIN TCVTVPA-LY
(PRED) Q8L6Z8_Arabidop FQQITGQPSV LYYAPSILQT AGFSAAADAT RISILLGLLK LVMTGVS-VI
(PRED) Q94AZ2_Arabidop FQQCTGINAI MFYAPVLFST LGFGS-DASL YSAVVTGAVN VLSTLVS-IY
(PRED) Q8BFW9_Mus_musc FVQTTGQPNL LFYASTVLKS VGFQSNEAAS LASTGVGVV VVSTIPA-TL
(PRED) Q7KWJ5_Plasmodi LQQFTGINVL VSNSNELYKE FLDS--HLIT ILSVMTAVN FLMTFPA-IY
(PRED) O44827_Caenorha AQQLSGINVA MFYSTVIFRG AGLTG-NEPF YATIGMGAVN VIMTLIS-VW
(PRED) P11166_Homo_sap SQQLSGINAV FYYSTSIFEK AGV---QQPV YATIGSGIVN TAFTVVS-LF
(PRED) P11167_Rattus_n SQQLSGINAV FYYSTSIFEK AGV---QQPV YATIGSGIVN TAFTVVS-LF
(PRED) P17809_Mus_musc SQQLSGINAV FYYSTSIFEK AGV---QQPV YATIGSGIVN TAFTVVS-LF
(PRED) P14142_Mus_musc SQQLSGINAV FYYSTSIFES AGV---QQPA YATIGAGVVN TVFTLVS-VL
(PRED) P19357_Rattus_n SQQLSGINAV FYYSTSIFEL AGV---EQPA YATIGAGVVN TVFTLVS-VL
(PRED) P14246_Mus_musc AQQFSGINGI FYYSTSIFQT AGI---SQPV YATIGVGAIN MIFTAVS-VL
(PRED) P12336_Rattus_n AQQFSGINGI FYYSTSIFQT AGI---SQPV YATIGVGAIN MIFTAVS-VL
(PRED) P11168_Homo_sap AQQFSGINGI FYYSTSIFQT AGI---SKPV YATIGVGAVN MVFTAVS-VF
(PRED) P32037_Mus_musc SQQLSGINAV FYYSTGIFKD AGV---QEPI YATIGAGVVN TIFTVVS-LF
(PRED) Q07647_Rattus_n SQQFSGINAV FYYSTGIFQD AGV---QEPI YATIGAGVVN TIFTVVS-LF
(PRED) P43427_Rattus_n GQQLSGVNAI YYYADQIYLS AGVKS-NDVQ YVTAGTGAVN VFMTMVT-VF
(PRED) Q9JIF3_Mus_musc FQQLSGVNAI MFYANSIFEE AKF---KDSS LASVTVGIIQ VLFTAVA-AL
(PRED) Q8K4S3_Rattus_n IDSVLIDCFT AGHDNYLALP SSV---PRQA ISVSFPRAPD GFYQCERGLE
```

```

. . . . . 510 . . . . . 520 . . . . . 530 . . . . . 540 . . . . . 550
(PRED) Q8VZ80_Arabidop LLD--RIGRR P LLLTSVGGM VLSLAALGTS LTI I--DQSE K-----
(PRED) G1UB10_Candida LVE--TWGRR P LLMAGSVVM AVSQLIVAIV GVA A--S--- -----
(PRED) Q5B0S0_Emericel IVE--HFGRR A SLMVGGAWM AICFYIWASV GNSV--LDLD N-----
(PRED) P13181_Saccharo TVE--NLGHR K CLLLGAATM MACMVIYASV GVTR--LYPH G-----
(PRED) P40886_Saccharo SVD--KLGRR R CLLLGAATM TACMVIYASV GVTR--LYPN G-----
(PRED) P32465_Saccharo TVD--RFGRR N CLMWGAVGM VCCYVYASV GVTR--LWPN G-----
(PRED) P32466_Saccharo TVD--RFGRR N CLLYGAIGM VCCYVYASV GVTR--LWPN G-----
(PRED) P39003_Saccharo VVE--RYGRR T CLLWGAASM TACMVYASV GVTR--LWPN G-----
(PRED) P39004_Saccharo VVE--RYGRR T CLLWGAASM TACMVYASV GVTR--LWPN G-----
(PRED) P32467_Saccharo LVE--RYGRR R CLLWGAASM TACMVV FASV GVTR--LWPN G-----
(PRED) P38695_Saccharo TVD--RFGRR N CLLWGCVGM ICCYVYASV GVTR--LWPN G-----
(PRED) P54862_Saccharo TIE--RFGRR T CLLWGAASM LCCFAV FASV GVTK--LWPQ G-----
(PRED) P40885_Saccharo TIE--RFGRR T CLLWGAASM LCCFAV FASV GVTK--LWPQ G-----
(PRED) P39924_Saccharo VVD--KIGRR K CLLFGAAGM MACMVIFASI GVKC--LYPH G-----
(PRED) P53631_Saccharo VVD--KIGRR K CLLFGAAGM MACMVIFASI GVKC--LYPH G-----
(PRED) P54854_Saccharo VVD--KIGRR K CLLFGAAGM MACMVIFASI GVKC--LYPH G-----
(PRED) P47185_Saccharo VVD--KIGRR K CLLFGAAGM MACMVIFASI GVKC--LYPH G-----
(PRED) P10870_Saccharo FVE--FFGRR K VLVVGGVIM TIANFIVAIV GCSL-----
(PRED) P43581_Saccharo IVD--KFGRR K CLLWGSASM AICFVIFATV GVTR--LWPQ G-----
(PRED) P23585_Saccharo TVD--KFGRR K CLLGGSASM AICFVIFSTV GVTS--LYPN G-----
(PRED) O74849_Schizosa VLE--YFGRR G PLIVGGVWQ SICFFIYASV GDRA--LTRP N-----
(PRED) P15325_Emericel LID--HFGRR N LLLVGAAGG SVCLWIVGGY IKIA--KPEN N-----
(PRED) Q59TA4_Candida FID--KVGRR P LLIGGATMM MAFQFGLAGI LGQY--SIPW PDS---GNDS
(PRED) Q59TK2_Candida FID--KVGRR P LLIGGATMM MAFQFGLAGI LGQY--SIPW PDS---GNDS
(PRED) Q8L6Z8_Arabidop VID--RVGRR P LLLCGVSGM VISLFLLSY YMFY-----
(PRED) Q94AZ2_Arabidop SVD--KVGRR V LLEAGVQM FFSQVVAII LGVK--V---
(PRED) Q8BFW9_Mus_musc LVD--HIGSK T FLCIGSSVM SASLLTMGIV NLNI--NMNF
(PRED) Q7KWJ5_Plasmodi IVE--KLGRK T LLLWGCVGV LVAYLPTAIA NEIN--R---
(PRED) O44827_Caenorha LVDHPKFGRR S LLAGLTGM FVSTLLVGA LTIQ--NSG-
(PRED) P11166_Homo_sap VVE--RAGRR T LHLIGLAGM AGCAILMTIA LALL--EQ--
(PRED) P11167_Rattus_n VVE--RAGRR T LHLIGLAGM AGCAVLMTIA LALL--EQ--
(PRED) P17809_Mus_musc VVE--RAGRR T LHLIGLAGM AGCAVLMTIA LALL--ER--
(PRED) P14142_Mus_musc LVE--RAGRR T LHLGLAGM CGCAILMTVA LLL--ER--
(PRED) P19357_Rattus_n LVE--RAGRR T LHLGLAGM CGCAILMTVA LLL--ER--
(PRED) P14246_Mus_musc LVE--KAGRR T LFLTGMIGM FFCTIFMSVG LVLL--DK--
(PRED) P12336_Rattus_n LVE--KAGRR T LFLAGMIGM FFCAVFMSLG LVLL--DK--
(PRED) P11168_Homo_sap LVE--KAGRR S LFLIGMSGM FVCAIFMSVG LVLL--NK--
(PRED) P32037_Mus_musc LVE--RAGRR T LHMIGLGM AVCSV FMTIS LLLK--DD--
(PRED) Q07647_Rattus_n LVE--RAGRR T LH MIGLGM AVCSV FMTIS LLLK--DE--
(PRED) P43427_Rattus_n VVE--LWGRR N LLLIGFSTC LTACIVLTVA LALQ--NT--
(PRED) Q9JIF3_Mus_musc IMD--RAGRR L LALS G VIM VFSMSAFGTY FKLT--QSLP SNSSHVGLVP
(PRED) Q8K4S3_Rattus_n RREGPLTLGL DGDVLRVGS L DTSKPRASGI LKRPQTLALP DVAGGNPET

```

```

. . . . . 560 . . . . . 570 . . . . . 580 . . . . . 590 . . . . . 600
(PRED) Q8VZ80_Arabidop -----KVM W AVVVAIATV MTYVATFSIG AGPITWVYSS EIF-PLRLRS
(PRED) G1UB10_Candida -----SH A ANQCLVAFS CIFIAGFAAT WGPLCWAICG ESF-ALNVRs
(PRED) Q5B0S0_Emericel -PQ----NTP K AGAAMIVFT CFFIAGFATT WGPVWSICS EMY-PNRSRA
(PRED) P13181_Saccharo -KSQP--SSK G AGNCMIVFT CFYIFCYATT WAPVAWVITA ESF-PLRVKS
(PRED) P40886_Saccharo -KSEP--SSK G AGNCTIVFT CFYIFCF SCT WGPVCYVVIS ETF-PLRVRS
(PRED) P32465_Saccharo -QDQP--SSK G AGNCMIVFA CFYIFCFATT WAPIAYVVIS ECF-PLRVKS
(PRED) P32466_Saccharo -EGNG--SSK G AGNCMIVFA CFYIFCFATT WAPIAYVVIS ETF-PLRVKS
(PRED) P39003_Saccharo -QDQP--SSK G AGNCMIVFA CFYIFCFATT WAPIYVVVS ETF-PLRVKS
(PRED) P39004_Saccharo -QDQP--SSK G AGNCMIVFA CFYIFCFATT WAPIYVVVS ETF-PLRVKS
(PRED) P32467_Saccharo -KKN G--SSK G AGNCMIVFT CFYIFCFATT WAPIPFVNS ETF-PLRVKS
(PRED) P38695_Saccharo -QDQP--SSK G AGNCMIVFA CFYIFCFATT WAPVAYVVIS ESY-PLRVRG
(PRED) P54862_Saccharo -SSHQDITSQ G AGNCMIVFT MFFIFS FATT WAGGCYVIVS ETF-PLRVKS
(PRED) P40885_Saccharo -SSHQDITSQ G AGNCMIVFT MFFIFS FATT WAGGCYVIVS ETF-PLRVKS
(PRED) P39924_Saccharo -QDGP--SSK G AGNAMIVFT CFYIFCFATT WAPVAYIVVA ESF-PSKVKS
(PRED) P53631_Saccharo -QDGP--SSK G AGNAMIVFT CFYIFCFATT WAPVAYIVVA ESF-PSKVKS
(PRED) P54854_Saccharo -QDGP--SSK G AGNAMIVFT CFYIFCFATT WAPVAYIVVA ESF-PSKVKS
(PRED) P47185_Saccharo -QDGP--SSK G AGNAMIVFT CFYIFCFATT WAPVAYIVVA ESF-PSKVKS
(PRED) P10870_Saccharo -----KTV A AAKVMIAFI CLFIAAFSAT WGGVVVVIS A ELY-PLGVRS
(PRED) P43581_Saccharo -KDQP--SSQ S AGNMIVFT CFFIFSFAIT WAPIAYVIVA ETY-PLRVKN
(PRED) P23585_Saccharo -KDQP--SSK A AGNMIVFT CLFIFFFAIS WAPIAYVIVA ESY-PLRVKN
(PRED) O74849_Schizosa -GT----SNH R AGVMIVFS CLFIFSFAQT WAPAAVIVG ESY-PIRYRS
(PRED) P15325_Emericel -PEGT--QLD S GGIAAIFFF YLWTA FYTPS WNGTPWVINS EMF-DPTVRS
(PRED) Q59TA4_Candida VNI RIPEDNK S ASKGA IACC YLFVASF AFT WGVGIWVYCA EIWDNRVAQ
(PRED) Q59TK2_Candida VNI RIPEDNK S ASKGA IACC YLFVASF AFT WGVGIWVYCA EIWDNRVAQ
(PRED) Q8L6Z8_Arabidop -----K N VPAVAVAL LLYVGCYQLS FGP I G WLMIS EIF-PLKLRG
(PRED) Q94AZ2_Arabidop -TDTSTNLSK G FA I LVVMI CTYVA AF A WS WGPLGWLIPS ETF-PLETRS
(PRED) Q8BFW9_Mus_musc -----TNI C RSHSLLNQS LEEFV FYATG NLSISNSSLR EHFKRITPYS
(PRED) Q7KWJ5_Plasmodi -----NSN F VKILSIVAT FVMIISFAVS YGPVLWIYH EMF-PSEIKD
(PRED) O44827_Caenorha -----GDK W ASYSAIGFV L LFVISFATG PGAIPWFFVS EIF-DSSARG

```

```
(PRED) P11166_Homo_sap -----LP WMSYLSIVAI FGFVAF FEVG PGPIPW FIVA ELF-SQGPRP
(PRED) P11167_Rattus_n -----LP WMSYLSIVAI FGFVAF FEVG PGPIPW FIVA ELF-SQGPRP
(PRED) P17809_Mus_musc -----LP WMSYLSIVAI FGFVAF FEVG PGPIPW FIVA ELF-SQGPRP
(PRED) P14142_Mus_musc -----VP AMSYVSIVAI FGFVAF FEIG PGPIPW FIVA ELF-SQGPRP
(PRED) P19357_Rattus_n -----VP SMSYVSIVAI FGFVAF FEIG PGPIPW FIVA ELF-SQGPRP
(PRED) P14246_Mus_musc -----FA WMSYVSM TAI FLVVSFFEIG PGPIPW F MVA EFF-SQGPRP
(PRED) P12336_Rattus_n -----FT WMSYVSM TAI FLVVSFFEIG PGPIPW F MVA EFF-SQGPRP
(PRED) P11168_Homo_sap -----FS WMSYVSM IAI FLVVSFFEIG PGPIPW F MVA EFF-SQGPRP
(PRED) P32037_Mus_musc -----YE AMSFVC IVAI LIYVAF FEIG PGPIPW FIVA ELF-SQGPRP
(PRED) Q07647_Rattus_n -----YE AMSFVC IVAI LVYVAF FEIG PGPIPW FIVA ELF-SQGPRP
(PRED) P43427_Rattus_n -----IS WMPYVS IVCV IVYVIGHAVG PSPIPALFIT EIF-LQSSRP
(PRED) Q9JIF3_Mus_musc IAAEPVDVQV GLAWLAVGSM CLFIAGFAVG WGPWP L LMS EIF-PLHVKG
(PRED) Q8K4S3_Rattus_n SRRRNVTFSQ QVANILLNGV KYESEL TGSS EQSEQPLSLR RLCSTIYNMP
```

```
..... 610 ..... 620 ..... 630 ..... 640 ..... 650
(PRED) Q8VZ80_Arabidop QGSSMGVVVN ----RVTSGV ISISFLPMSK A-----M TTGGAFY-LF
(PRED) G1UB10_Candida_K SISLCTASN ----WLWNFG IGY-ATPYMV DSGKGNA--D LGSKVFF-IW
(PRED) Q5B0S0_Emericel T SIGIATCAN ----WTWNFL ISF-FTPFI S G-----S IHFAYGY-VF
(PRED) P13181_Saccharo K CMALASASN ----VWVGFL IAF-FTPFI T S-----A INFYYGY-VF
(PRED) P40886_Saccharo K CMSVATAAN ----LLWGFL IGF-FTPFI T S-----A INFYYGY-VF
(PRED) P32465_Saccharo K CMSIASAAN ----WIWGFL ISF-FTPFI T G-----A INFYYGY-VF
(PRED) P32466_Saccharo K AMSIATAAN ----WLWGFL IGF-FTPFI T G-----A INFYYGY-VF
(PRED) P39003_Saccharo K AMSIATAAN ----WLWGFL IGF-FTPFI T G-----A INFYYGY-VF
(PRED) P39004_Saccharo K AMSIATAAN ----WLWGFL IGF-FTPFI T G-----A INFYYGY-VF
(PRED) P32467_Saccharo K CMAIAQACN ----WIWGFL IGF-FTPFI S G-----A IDFYGY-VF
(PRED) P38695_Saccharo K AMSIASACN ----WIWGFL ISF-FTPFI T S-----A INFYYGY-VF
(PRED) P54862_Saccharo R GMAIATAAN ----WMWGFL ISF-FTPFI T G-----A INFYYGY-VF
(PRED) P40885_Saccharo R GMAIATAAN ----WMWGFL ISF-FTPFI T G-----A INFYYGY-VF
(PRED) P39924_Saccharo R AMSISTACN ----WLWQFL IGF-FTPFI T G-----S IHFYGY-VF
(PRED) P53631_Saccharo R AMSISTACN ----WLWQFL IGF-FTPFI T G-----S IHFYGY-VF
(PRED) P54854_Saccharo K AMSISTAFN ----WLWQFL IGF-FTPFI T G-----S IHFYGY-VF
(PRED) P47185_Saccharo K AMSISTAFN ----WLWQFL IGF-FTPFI T G-----S IHFYGY-VF
(PRED) P10870_Saccharo K CTAICAAAN ----WLVNFI CAL-ITPYIV DTGSHTS--S LGAKIFF-IW
(PRED) P43581_Saccharo R AMAIAVGAN ----WMWGFL IGF-FTPFI T R-----S IGFSYGY-VF
(PRED) P23585_Saccharo R AMAIAVGAN ----WIWGFL IGF-FTPFI T S-----A IGFSYGY-VF
(PRED) O74849_Schizosa K CAAVATASN ----WFWNFM ISF-FTPFI S N-----S IGFKYGY-VF
(PRED) P15325_Emericel LAQACAAASN ----WLWNFL ISR-FTPQMF T-----S MGYGVYF-FF
(PRED) Q59TA4_Candida_R GNAI STSAN ----WILNFA IAM-YTPSGF K-----N ISWKTYI-IY
(PRED) Q59TK2_Candida_R GNAI STSAN ----WILNFA IAM-YTPGF K-----N ISWKTYI-IY
(PRED) Q8L6Z8_Arabidop R GISLAVLVN ----FGANAL VTF-AFSPLK E-----L LGAGILFCAF
(PRED) Q94AZ2_Arabidop AGQSVTVCVN ----LLETFI IAQ-AFLSML C-----H FKFGIFI-FF
(PRED) Q8BFW9_Mus_musc KGSFMPMGNG MEPKGEMTFT SSLPNAGLSR TE-----H QGVTD TAVVP
(PRED) Q7KWJ5_Plasmodi SAASLASLVN ----WVCAII VVF-PSDIII K-----K SPSILFI-VF
(PRED) O44827_Caenorha NANSIAVMVN ----WAANLL VGL-TFLPIN N-----L MQQYSFF-IF
(PRED) P11166_Homo_sap AAI AVAGFSN ----WTSNFI VGM-CFQYVE Q-----L CGPYVFI-IF
(PRED) P11167_Rattus_n AAV AVAGFSN ----WTSNFI VGM-CFQYVE Q-----L CGPYVFI-IF
(PRED) P17809_Mus_musc AAI AVAGFSN ----WTSNFI VGM-CFQYVE Q-----L CGPYVFI-IF
(PRED) P14142_Mus_musc AAM AVAGFSN ----WTCNFI VGM-GFQYVA D-----A MGPYVFL-LF
(PRED) P19357_Rattus_n AAM AVAGFSN ----WTCNFI VGM-GFQYVA D-----A MGPYVFL-LF
(PRED) P14246_Mus_musc TALALAAFSN ----WVCNFI IAL-CFQYIA D-----F LGPYVFF-LF
(PRED) P12336_Rattus_n TALALAAFSN ----WVCNFI IAL-CFQYIA D-----F LGPYVFF-LF
(PRED) P11168_Homo_sap AALAI AAFSN ----WTCNFI VAL-CFQYIA D-----F CGPYVFF-LF
(PRED) P32037_Mus_musc AAI AVAGCCN ----WTSNFL VGM-LFPSAA A-----Y LGAYVFI-IF
(PRED) Q07647_Rattus_n AAM AVAGCSN ----WTSNFL VGM-FFPSAA A-----Y LGAYVFI-IF
(PRED) P43427_Rattus_n SAYMIGGSVH ----WLSNFI VGL-IFPFI Q V-----G LGPYSFI-IF
(PRED) Q9JIF3_Mus_musc VATGICVLTN ----WFM A FL VTK-EFSSVM E-----M LRPYGAFWLT
(PRED) Q8K4S3_Rattus_n RPVRNLCVNH F-LGWLSFEG MLLFYTDFMG EVVFQGD PKA PHASEAYQKY
```

```
..... 660 ..... 670 ..... 680 ..... 690 ..... 700
(PRED) Q8VZ80_Arabidop GGIA--TVAW VFFYTF LPET QGRMLEDMDE LFSGF--RWR DSKSKPKGNP
(PRED) G1UB10_Candida_G GCN--VIGG LFAYFMVYET KSLTLEQVDE LYLKVDHAWQ SKGFVPSVHA
(PRED) Q5B0S0_Emericel ASCC--VVG V LIVFFFVNET QGRTLEEVD T MYVLHVVPWK SASWVPDESI
(PRED) P13181_Saccharo MGCL--VAMF FYVFFFVPET KGLSLEEIQE LWEEGVLPWK SEGWIPSSRR
(PRED) P40886_Saccharo MGCL--AFSY FYVFFFVPET KGLTLEEVD E MWMDGVLPWK SESWVPASRR
(PRED) P32465_Saccharo MGCM--VFAY FYVFFFVPET KGLSLEEVD N MYAEGVLPWK SASWVPVSKR
(PRED) P32466_Saccharo MGCM--VFAY FYVFFFVPET KGLTLEEVD N MYAEGVLPWK SASWVPTSQR
(PRED) P39003_Saccharo MGCL--VFMF FYVLLVVPET KGLTLEEVD N MWEEGVLPWK SASWVPPSRR
(PRED) P39004_Saccharo MGCL--VFMF FYVLLVVPET KGLTLEEVD N MWEEGVLPWK SASWVPPSRR
(PRED) P32467_Saccharo MGCL--VFSY FYVFFFVPET KGLTLEEVD N LWEEGVLPWK SPSWVPPNKR
(PRED) P38695_Saccharo MGCM--VFAY FYVFFFVPET KGLTLEEVD N MYEENVLPWK STKWIPSSRR
(PRED) P54862_Saccharo LGCL--VFAY FYVFFFVPET KGLTLEEVD N MWLEGVPAWK SASWVPPERR
(PRED) P40885_Saccharo LGCL--VFAY FYVFFFVPET KGLTLEEVD N MWLEGVPAWK SASWVPPERR
(PRED) P39924_Saccharo VGCL--VAMF LYVFFF LPET IGLSLEEIQ L LYEEGIKPWK SASWVPPSRR
(PRED) P53631_Saccharo VGCL--VAMF LYVFFF LPET IGLSLEEIQ L LYEEGIKPWK SASWVPPSRR
(PRED) P54854_Saccharo VGCL--VAMF LYVFFF LPET IGLSLEEIQ L LYEEGIKPWK SASWVPPSRR
```



```
(PRED) P47185_Saccharo VGCL--VAMF LYVFFF LPET IGLSLEETQL LYEEGIKPWK SASWVPPSRR
(PRED) P10870_Saccharo GSLN--AMGV IVVYLT VYET KGLTLEEIDE LYIKSSTGVV SPKFNKDIRE
(PRED) P43581_Saccharo MGCL--IFS Y FVFFF VCET KGLTLEE VNE MYEERIKPWK SGGWIPSSRR
(PRED) P23585_Saccharo MGCL--VFS F FVFFF VCET KGLTLEE VNE MYVEGVKPWK SGSWISKEKR
(PRED) O74849_Schizosa AACN--LCAA IIIFLFAKET KGLTLEEINQ LYLSNIKPWN TGAYQRDRED
(PRED) P15325_Emericel ASLM--ILSI VFVFFLIPET KGVPLESMET LFDKKP-VWH AHSQLIRELR
(PRED) Q59TA4_Candida GVFC--FAMA THVYFGFPET KGKRLEEIGQ MWEERVPAWR SRSWQPTVPI
(PRED) Q59TK2_Candida GVFC--FAMA THVYFGFPET KGKRLEEIGQ MWEERVPAWR SRSWQPTVPI
(PRED) Q8L6Z8_Arabidop GVIC--VVS L FFIYYIVPET KGLTLEEIEA KCL-----
(PRED) Q94AZ2_Arabidop SAWV--LIMS VFVMFLLPET KNIPIEEMTE RVWKK--HWF WARFMDDHND
(PRED) Q8BFW9_Mus_musc AAYK--WLSL ASLLVYVA-- -AFSIGLGPM PW-----
(PRED) Q7KWJ5_Plasmodi SVMS--ILTF FFIFFFIKET KGGEIGTSPY ITMEERQKHM TKSUV-----
(PRED) O44827_Caenorha SGFL--AFFI FYTWKFPET KGKSIEQIQ A EFEKRK----
(PRED) P11166_Homo_sap TVLL--VLFF IFTYFKVPET KGRTFDEIAS GFRQG-GASQ -SDKTPEELF
(PRED) P11167_Rattus_n TVLL--VLFF IFTYFKVPET KGRTFDEIAS GFRQG-GASQ -SDKTPEELF
(PRED) P17809_Mus_musc TVLL--VLFF IFTYFKVPET KGRTFDEIAS GFRQG-GASQ -SDKTPEELF
(PRED) P14142_Mus_musc AVLL--LGFF IFTFLKVPET RGRTFDQISA AFRRTPSLLE -QEVKPSTEL
(PRED) P19357_Rattus_n AVLL--LGFF IFTFLRVPET RGRTFDQISA TFRRTPSLLE -QEVKPSTEL
(PRED) P14246_Mus_musc AGVV--LVFT LFTFFKVPET KGKSFEEIAA EFRKK-SGSA -PPRKA AVQM
(PRED) P12336_Rattus_n AGVV--LVFT LFTFFKVPET KGKSFDEIAA EFRKK-SGSA -PPRKA TVQM
(PRED) P11168_Homo_sap AGVL--LAFT LFTFFKVPET KGKSFEEIAA EFQKK-SGSA -HRPKAAVEM
(PRED) P32037_Mus_musc AAF L--IFFL IFTFFKVPET KGRTFEDIAR AFEGQ--AHS -GKGPAGVEL
(PRED) Q07647_Rattus_n AAF L--VFFL IFTSFKVPET KGRTFEDITR AFEGQ--AHS -GKGSAGVEL
(PRED) P43427_Rattus_n AIIC--LLTT IYIFMVVPET KGRTFVEINQ IFAKKNKVS D VYPEKEEKEL
(PRED) Q9JIF3_Mus_musc AAF C--ALSV LFTLTVVPET KGRTLEQVTA HFEGR-----
(PRED) Q8K4S3_Rattus_n NS GVTMGCWG MCIYAFSAAF YSAILEKLEE CLSVRTLYFI AYLFLGLGTG
```

```
..... 710 ..... 720 ..... 730 ..... 740 ..... 750
(PRED) Q8VZ80_Arabidop EKT V--PNPE VEIGSNKQWK EGD TQSS ---
(PRED) G1UB10_Candida FRDD--GDIE HISSDGKAEM VEVDENS V--
(PRED) Q5B0S0_Emericel VRD---LHPG SDANKTEGLG QAEHG ESRP EPVEIRE---
(PRED) P13181_Saccharo GNN---YDLE DLQHDDKPWY KAMLE-----
(PRED) P40886_Saccharo DGD---YDNE KLQHDEKPFY KRMF-----
(PRED) P32465_Saccharo GAD---YNAD DLMHDDQPFY KSLFSRK---
(PRED) P32466_Saccharo GAN---YDAD ALMHDDQPFY KKMFGKK---
(PRED) P39003_Saccharo GAN---YDAE EMAHDDKPLY KRMFSTK---
(PRED) P39004_Saccharo GAN---YDAE EMTHDDKPLY KRMFSTK---
(PRED) P32467_Saccharo GTD---YNAD DLMHDDQPFY KKMFGKK---
(PRED) P38695_Saccharo TTD---YDLD ATRNDPRPFY KRMF TKEK--
(PRED) P54862_Saccharo TAD---YDAD AIDHDNRPIY KRFFSS---
(PRED) P40885_Saccharo TAD---YDAD AIDHDDRPIY KRFFSS---
(PRED) P39924_Saccharo GIS---SEES KTEKKDWKKF LKFSKNSD--
(PRED) P53631_Saccharo GIP---SEES KTEKKDWKKF LKFSKGS D--
(PRED) P54854_Saccharo GAS---SRET EAKKKS WKEV LKFPKSFN--
(PRED) P47185_Saccharo GAS---SRET EAKKKS WKEV LKFPKSFN--
(PRED) P10870_Saccharo RALKFQYDPL QRLEDGKNTF VAKRNNFDDE TPRNDFRNTI SGEIDHSPNQ
(PRED) P43581_Saccharo TPQP--TSSTP LVIVDSK---
(PRED) P23585_Saccharo VSEE-----
(PRED) O74849_Schizosa IKQ---SDSE KERGPTSKLH EYVEHAPNSY ASTHSTES EN YPQQVTNPVG
(PRED) P15325_Emericel ENEEA FRADM GASGKGGVTK EYVEEA---
(PRED) Q59TA4_Candida ASDAELARKM EVEHEEDKLM NEDSNSESRE NQA-----
(PRED) Q59TK2_Candida ASDAELARKM EVEHEEDKLM NEDSNSESRE NQA-----
(PRED) Q8L6Z8_Arabidop -----
(PRED) Q94AZ2_Arabidop HEF---VNGE KSN GKSNGFD PSTRL-----
(PRED) Q8BFW9_Mus_musc -----
(PRED) Q7KWJ5_Plasmodi -----
(PRED) O44827_Caenorha -----
(PRED) P11166_Homo_sap HPLGADSQV-
(PRED) P11167_Rattus_n HPLGADSQV-
(PRED) P17809_Mus_musc HPLGADSQV-
(PRED) P14142_Mus_musc EYLGPDEND-
(PRED) P19357_Rattus_n EYLGPDEND-
(PRED) P14246_Mus_musc EFLASSESV-
(PRED) P12336_Rattus_n EFLGSSETV-
(PRED) P11168_Homo_sap KFLGATETV-
(PRED) P32037_Mus_musc NSMQPVKETP GNA-----
(PRED) Q07647_Rattus_n NSMQPVKETP GNA-----
(PRED) P43427_Rattus_n NDLP PATREQ -----
(PRED) Q9JIF3_Mus_musc -----
(PRED) Q8K4S3_Rattus_n LATLS-----
```

```
..... 760 ..... 770 ..... 780 ..... 790 ..... 800
(PRED) Q8VZ80_Arabidop -----
(PRED) G1UB10_Candida -----
(PRED) Q5B0S0_Emericel -----
```

```
(PRED) P13181_Saccharo -----
(PRED) P40886_Saccharo -----
(PRED) P32465_Saccharo -----
(PRED) P32466_Saccharo -----
(PRED) P39003_Saccharo -----
(PRED) P39004_Saccharo -----
(PRED) P32467_Saccharo -----
(PRED) P38695_Saccharo -----
(PRED) P54862_Saccharo -----
(PRED) P40885_Saccharo -----
(PRED) P39924_Saccharo -----
(PRED) P53631_Saccharo -----
(PRED) P54854_Saccharo -----
(PRED) P47185_Saccharo -----
(PRED) P10870_Saccharo KEVHSIPERV DIPTSTEILE SPNKSSGMTV PVSPSLQDVP IPQTTEPAEI
(PRED) P43581_Saccharo -----
(PRED) P23585_Saccharo -----
(PRED) O74849_Schizosa L-----
(PRED) P15325_Emericel -----
(PRED) Q59TA4_Candida_ -----
(PRED) Q59TK2_Candida_ -----
(PRED) Q8L6Z8_Arabidop -----
(PRED) Q94AZ2_Arabidop -----
(PRED) Q8BFW9_Mus_musc -----
(PRED) Q7KWJ5_Plasmodi -----
(PRED) O44827_Caenorha -----
(PRED) P11166_Homo_sap -----
(PRED) P11167_Rattus_n -----
(PRED) P17809_Mus_musc -----
(PRED) P14142_Mus_musc -----
(PRED) P19357_Rattus_n -----
(PRED) P14246_Mus_musc -----
(PRED) P12336_Rattus_n -----
(PRED) P11168_Homo_sap -----
(PRED) P32037_Mus_musc -----
(PRED) Q07647_Rattus_n -----
(PRED) P43427_Rattus_n -----
(PRED) Q9JIF3_Mus_musc -----
(PRED) Q8K4S3_Rattus_n -----
```

..... 810 ..... 820 ..... 830 ..... 840 ..... 850

```
(PRED) Q8VZ80_Arabidop -----
(PRED) G1UB10_Candida_ -----
(PRED) Q5B0S0_Emericel -----
(PRED) P13181_Saccharo -----
(PRED) P40886_Saccharo -----
(PRED) P32465_Saccharo -----
(PRED) P32466_Saccharo -----
(PRED) P39003_Saccharo -----
(PRED) P39004_Saccharo -----
(PRED) P32467_Saccharo -----
(PRED) P38695_Saccharo -----
(PRED) P54862_Saccharo -----
(PRED) P40885_Saccharo -----
(PRED) P39924_Saccharo -----
(PRED) P53631_Saccharo -----
(PRED) P54854_Saccharo -----
(PRED) P47185_Saccharo -----
(PRED) P10870_Saccharo RTKYVDLGNG LGLNTYNRGP PSLSSDSSSED YTEDEIGGPS SQGDQSNRST
(PRED) P43581_Saccharo -----
(PRED) P23585_Saccharo -----
(PRED) O74849_Schizosa -----
(PRED) P15325_Emericel -----
(PRED) Q59TA4_Candida_ -----
(PRED) Q59TK2_Candida_ -----
(PRED) Q8L6Z8_Arabidop -----
(PRED) Q94AZ2_Arabidop -----
(PRED) Q8BFW9_Mus_musc --- LVL --- -- SEIFPGGI RGRA --- M ALTSSMNWGV
(PRED) Q7KWJ5_Plasmodi -----
(PRED) O44827_Caenorha -----
(PRED) P11166_Homo_sap -----
(PRED) P11167_Rattus_n -----
(PRED) P17809_Mus_musc -----
(PRED) P14142_Mus_musc -----
(PRED) P19357_Rattus_n -----
```

|                        |            |            |            |            |              |
|------------------------|------------|------------|------------|------------|--------------|
| (PRED) P14246_Mus_musc | -----      | -----      | -----      | -----      | -----        |
| (PRED) P12336_Rattus_n | -----      | -----      | -----      | -----      | -----        |
| (PRED) P11168_Homo_sap | -----      | -----      | -----      | -----      | -----        |
| (PRED) P32037_Mus_musc | -----      | -----      | -----      | -----      | -----        |
| (PRED) Q07647_Rattus_n | -----      | -----      | -----      | -----      | -----        |
| (PRED) P43427_Rattus_n | -----      | -----      | -----      | -----      | -----        |
| (PRED) Q9JIF3_Mus_musc | -----      | -----      | -----      | -----      | -----        |
| (PRED) Q8K4S3_Rattus_n | -----      | --RNLYVVLS | LCTH       | -----      | Y GILFSTLCTL |
|                        | ..... 860  | ..... 870  | ..... 880  | ..... 890  | ..... 900    |
| (PRED) Q8VZ80_Arabidop | -----      | -----      | -----      | -----      | -----        |
| (PRED) G1UB10_Candida  | -----      | -----      | -----      | -----      | -----        |
| (PRED) Q5B0S0_Emericel | -----      | -----      | -----      | -----      | -----        |
| (PRED) P13181_Saccharo | -----      | -----      | -----      | -----      | -----        |
| (PRED) P40886_Saccharo | -----      | -----      | -----      | -----      | -----        |
| (PRED) P32465_Saccharo | -----      | -----      | -----      | -----      | -----        |
| (PRED) P32466_Saccharo | -----      | -----      | -----      | -----      | -----        |
| (PRED) P39003_Saccharo | -----      | -----      | -----      | -----      | -----        |
| (PRED) P39004_Saccharo | -----      | -----      | -----      | -----      | -----        |
| (PRED) P32467_Saccharo | -----      | -----      | -----      | -----      | -----        |
| (PRED) P38695_Saccharo | -----      | -----      | -----      | -----      | -----        |
| (PRED) P54862_Saccharo | -----      | -----      | -----      | -----      | -----        |
| (PRED) P40885_Saccharo | -----      | -----      | -----      | -----      | -----        |
| (PRED) P39924_Saccharo | -----      | -----      | -----      | -----      | -----        |
| (PRED) P53631_Saccharo | -----      | -----      | -----      | -----      | -----        |
| (PRED) P54854_Saccharo | -----      | -----      | -----      | -----      | -----        |
| (PRED) P47185_Saccharo | -----      | -----      | -----      | -----      | -----        |
| (PRED) P10870_Saccharo | MNDINDYMAR | LIHSTSTASN | TTDKFSGNQS | TLRYHTASSH | SDTTEEDSNL   |
| (PRED) P43581_Saccharo | -----      | -----      | -----      | -----      | -----        |
| (PRED) P23585_Saccharo | -----      | -----      | -----      | -----      | -----        |
| (PRED) O74849_Schizosa | -----      | -----      | -----      | -----      | -----        |
| (PRED) P15325_Emericel | -----      | -----      | -----      | -----      | -----        |
| (PRED) Q59TA4_Candida  | -----      | -----      | -----      | -----      | -----        |
| (PRED) Q59TK2_Candida  | -----      | -----      | -----      | -----      | -----        |
| (PRED) Q8L6Z8_Arabidop | -----      | -----      | -----      | -----      | -----        |
| (PRED) Q94AZ2_Arabidop | -----      | -----      | -----      | -----      | -----        |
| (PRED) Q8BFW9_Mus_musc | NLLISLTFLT | VTDL       | -----      | -----      | -----        |
| (PRED) Q7KWJ5_Plasmodi | -----      | -----      | -----      | -----      | -----        |
| (PRED) O44827_Caenorha | -----      | -----      | -----      | -----      | -----        |
| (PRED) P11166_Homo_sap | -----      | -----      | -----      | -----      | -----        |
| (PRED) P11167_Rattus_n | -----      | -----      | -----      | -----      | -----        |
| (PRED) P17809_Mus_musc | -----      | -----      | -----      | -----      | -----        |
| (PRED) P14142_Mus_musc | -----      | -----      | -----      | -----      | -----        |
| (PRED) P19357_Rattus_n | -----      | -----      | -----      | -----      | -----        |
| (PRED) P14246_Mus_musc | -----      | -----      | -----      | -----      | -----        |
| (PRED) P12336_Rattus_n | -----      | -----      | -----      | -----      | -----        |
| (PRED) P11168_Homo_sap | -----      | -----      | -----      | -----      | -----        |
| (PRED) P32037_Mus_musc | -----      | -----      | -----      | -----      | -----        |
| (PRED) Q07647_Rattus_n | -----      | -----      | -----      | -----      | -----        |
| (PRED) P43427_Rattus_n | -----      | -----      | -----      | -----      | -----        |
| (PRED) Q9JIF3_Mus_musc | -----      | -----      | -----      | -----      | -----        |
| (PRED) Q8K4S3_Rattus_n | PYSLLCDYYQ | SKKFAGSSA  | -----      | -----      | -----        |
|                        | ..... 910  | ..... 920  | ..... 930  | ..... 940  | ..... 950    |
| (PRED) Q8VZ80_Arabidop | -----      | -----      | -----      | -----      | -----        |
| (PRED) G1UB10_Candida  | -----      | -----      | -----      | -----      | -----        |
| (PRED) Q5B0S0_Emericel | -----      | -----      | -----      | -----      | -----        |
| (PRED) P13181_Saccharo | -----      | -----      | -----      | -----      | -----        |
| (PRED) P40886_Saccharo | -----      | -----      | -----      | -----      | -----        |
| (PRED) P32465_Saccharo | -----      | -----      | -----      | -----      | -----        |
| (PRED) P32466_Saccharo | -----      | -----      | -----      | -----      | -----        |
| (PRED) P39003_Saccharo | -----      | -----      | -----      | -----      | -----        |
| (PRED) P39004_Saccharo | -----      | -----      | -----      | -----      | -----        |
| (PRED) P32467_Saccharo | -----      | -----      | -----      | -----      | -----        |
| (PRED) P38695_Saccharo | -----      | -----      | -----      | -----      | -----        |
| (PRED) P54862_Saccharo | -----      | -----      | -----      | -----      | -----        |
| (PRED) P40885_Saccharo | -----      | -----      | -----      | -----      | -----        |
| (PRED) P39924_Saccharo | -----      | -----      | -----      | -----      | -----        |
| (PRED) P53631_Saccharo | -----      | -----      | -----      | -----      | -----        |
| (PRED) P54854_Saccharo | -----      | -----      | -----      | -----      | -----        |
| (PRED) P47185_Saccharo | -----      | -----      | -----      | -----      | -----        |
| (PRED) P10870_Saccharo | MDLGNGLALN | AYNRGPPSIL | MNSSDEEANG | GETSDNLNTA | QDLAGMKERM   |
| (PRED) P43581_Saccharo | -----      | -----      | -----      | -----      | -----        |
| (PRED) P23585_Saccharo | -----      | -----      | -----      | -----      | -----        |
| (PRED) O74849_Schizosa | -----      | -----      | -----      | -----      | -----        |

```

(PRED) P15325_Emericel -----
(PRED) Q59TA4_Candida -----
(PRED) Q59TK2_Candida -----
(PRED) Q8L6Z8_Arabidop -----
(PRED) Q94AZ2_Arabidop -----
(PRED) Q8BFW9_Mus_musc IGLSWVCFIY TIMSLASLAF VVLFIPETKG ----- CSLEQIS
(PRED) Q7Kwj5_Plasmodi -----
(PRED) O44827_Caenorha -----
(PRED) P11166_Homo_sap -----
(PRED) P11167_Rattus_n -----
(PRED) P17809_Mus_musc -----
(PRED) P14142_Mus_musc -----
(PRED) P19357_Rattus_n -----
(PRED) P14246_Mus_musc -----
(PRED) P12336_Rattus_n -----
(PRED) P11168_Homo_sap -----
(PRED) P32037_Mus_musc -----
(PRED) Q07647_Rattus_n -----
(PRED) P43427_Rattus_n -----
(PRED) Q9JIF3_Mus_musc -----
(PRED) Q8K4S3_Rattus_n DGTRRGMGVD ISLLSCQYFL AQILVS----- LVLGPLT
          ..... 960 ..... 970 ..... 980 ..... 990 ..... 1000
(PRED) Q8VZ80_Arabidop -----
(PRED) G1UB10_Candida -----
(PRED) Q5B0S0_Emericel -----
(PRED) P13181_Saccharo -----
(PRED) P40886_Saccharo -----
(PRED) P32465_Saccharo -----
(PRED) P32466_Saccharo -----
(PRED) P39003_Saccharo -----
(PRED) P39004_Saccharo -----
(PRED) P32467_Saccharo -----
(PRED) P38695_Saccharo -----
(PRED) P54862_Saccharo -----
(PRED) P40885_Saccharo -----
(PRED) P39924_Saccharo -----
(PRED) P53631_Saccharo -----
(PRED) P54854_Saccharo -----
(PRED) P47185_Saccharo -----
(PRED) P10870_Saccharo AQFAQSYIDK RGGLEPETQS NILSTSL SVM ADTNEHNNEI LHSSEENATN
(PRED) P43581_Saccharo -----
(PRED) P23585_Saccharo -----
(PRED) O74849_Schizosa -----
(PRED) P15325_Emericel -----
(PRED) Q59TA4_Candida -----
(PRED) Q59TK2_Candida -----
(PRED) Q8L6Z8_Arabidop -----
(PRED) Q94AZ2_Arabidop -----
(PRED) Q8BFW9_Mus_musc VELAKANYVK NNICFMSHHQ EELVPTQLQK RKPQEQQLPEC NHLCGRGQSQ
(PRED) Q7Kwj5_Plasmodi -----
(PRED) O44827_Caenorha -----
(PRED) P11166_Homo_sap -----
(PRED) P11167_Rattus_n -----
(PRED) P17809_Mus_musc -----
(PRED) P14142_Mus_musc -----
(PRED) P19357_Rattus_n -----
(PRED) P14246_Mus_musc -----
(PRED) P12336_Rattus_n -----
(PRED) P11168_Homo_sap -----
(PRED) P32037_Mus_musc -----
(PRED) Q07647_Rattus_n -----
(PRED) P43427_Rattus_n -----
(PRED) Q9JIF3_Mus_musc -----
(PRED) Q8K4S3_Rattus_n SAVGSANGVM YFASLVSFLG CLYSSLCVTY EIPSADAADE ERQPLLLNV-
          ..... 1010
(PRED) Q8VZ80_Arabidop -----
(PRED) G1UB10_Candida -----
(PRED) Q5B0S0_Emericel -----
(PRED) P13181_Saccharo -----
(PRED) P40886_Saccharo -----
(PRED) P32465_Saccharo -----
(PRED) P32466_Saccharo -----
(PRED) P39003_Saccharo -----

```

(PRED) P39004\_Saccharo -----  
(PRED) P32467\_Saccharo -----  
(PRED) P38695\_Saccharo -----  
(PRED) P54862\_Saccharo -----  
(PRED) P40885\_Saccharo -----  
(PRED) P39924\_Saccharo -----  
(PRED) P53631\_Saccharo -----  
(PRED) P54854\_Saccharo -----  
(PRED) P47185\_Saccharo -----  
(PRED) P10870\_Saccharo QP V N E N N D L K  
(PRED) P43581\_Saccharo -----  
(PRED) P23585\_Saccharo -----  
(PRED) O74849\_Schizosa -----  
(PRED) P15325\_Emericel -----  
(PRED) Q59TA4\_Candida\_ -----  
(PRED) Q59TK2\_Candida\_ -----  
(PRED) Q8L6Z8\_Arabidop -----  
(PRED) Q94AZ2\_Arabidop -----  
(PRED) Q8BFW9\_Mus\_musc R P S P D T -----  
(PRED) Q7KWJ5\_Plasmodi -----  
(PRED) O44827\_Caenorha -----  
(PRED) P11166\_Homo\_sap -----  
(PRED) P11167\_Rattus\_n -----  
(PRED) P17809\_Mus\_musc -----  
(PRED) P14142\_Mus\_musc -----  
(PRED) P19357\_Rattus\_n -----  
(PRED) P14246\_Mus\_musc -----  
(PRED) P12336\_Rattus\_n -----  
(PRED) P11168\_Homo\_sap -----  
(PRED) P32037\_Mus\_musc -----  
(PRED) Q07647\_Rattus\_n -----  
(PRED) P43427\_Rattus\_n -----  
(PRED) Q9JIF3\_Mus\_musc -----  
(PRED) Q8K4S3\_Rattus\_n -----
