# Supplementary material for: Aspergillus niger membrane-associated proteome analysis for the identification of glucose transporters
Source: PubMed Central journal article supplement (PMC4574540; doi:10.1186/s13068-015-0317-9), 2015-09-17
Supplement: 13068_2015_317_MOESM3_ESM.pdf [file 13068_2015_317_MOESM3_ESM.pdf]

### Number of proteins identified in the 3 different conditions

|                         | $N_{\text{tot}}$ | $N_{\text{unique}}$ | $N_{\text{tmHMM}}$ | $N_{\text{tmHMM}}/N_{\text{tot}}$ [%] | $Q_{\text{tmHMM}}/Q_{\text{tot}}$ [%] |
|-------------------------|------------------|---------------------|--------------------|---------------------------------------|---------------------------------------|
| sorbitol                | 651              | 72                  | 187                | 28.73                                 | 15.28                                 |
| sorbitol + 1mM glucose  | 543              | 34                  | 155                | 28.55                                 | 17.50                                 |
| sorbitol + 60mM glucose | 692              | 106                 | 193                | 27.89                                 | 15.45                                 |

$N_{\text{tot}}$  = total number of proteins in the sample

$N_{\text{unique}}$  = number of proteins found only in this condition

$N_{\text{tmHMM}}$  = number of proteins in the sample containing at least one transmembrane helix domain

Q = averaged protein abundance [a.u]
