# Supplementary material for: Aspergillus niger membrane-associated proteome analysis for the identification of glucose transporters
Source: PubMed Central journal article supplement (PMC4574540; doi:10.1186/s13068-015-0317-9), 2015-09-17
Supplement: 13068_2015_317_MOESM4_ESM.pdf [file 13068_2015_317_MOESM4_ESM.pdf]

| protID                  | TmD    | sorbitol         | sorbitol + 1mM<br>glucose | sorbitol + 60mM<br>glucose | Description (conserved domains)                                                                                                                                                                                                  |
|-------------------------|--------|------------------|---------------------------|----------------------------|----------------------------------------------------------------------------------------------------------------------------------------------------------------------------------------------------------------------------------|
|                         |        | rel. ab ± sd [%] | rel. ab ± sd [%]          | rel. ab ± sd [%]           |                                                                                                                                                                                                                                  |
| <b>Plasma membrane</b>  |        |                  |                           |                            |                                                                                                                                                                                                                                  |
| 201546                  | 4      | 0.984 ± 0.008    | 1.141 ± 0.039             | 0.353 ± 0.262              | -                                                                                                                                                                                                                                |
| 1145073;1115054;1186115 | 9;9;10 | 0.677 ± 0.152    | 0.908 ± 0.260             | 0.763 ± 0.063              | ATPase, P-type,<br>K/Mg/Cd/Cu/Zn/Na/Ca/Na/H-transporter<br>ATPase, P-type cation-transporter, N-terminal<br>Plasma-membrane proton-efflux P-type ATPase<br>H+ transporting ATPase, proton pump<br>E1-E2 ATPase-associated region |
| 1180988                 | 4      | 0.131 ± 0.011    | 0.151 ± 0.011             | 0.241 ± 0.008              | Yip1 domain<br>Bacterial surface antigen (D15)                                                                                                                                                                                   |
| 1141113                 | 1      | 0.116 ± 0.030    | 0.032 ± 0.001             | 0.089 ± 0.011              | Glycoside hydrolase, catalytic core<br>X8                                                                                                                                                                                        |
| 1093022                 | 11     | 0.116 ± 0.000    | 0.041 ± 0.001             | 0.080 ± 0.013              | Amino acid transporter, transmembrane                                                                                                                                                                                            |
| 1142721                 | 3      | 0.103 ± 0.009    | 0.113 ± 0.013             | 0.060 ± 0.002              | B-cell receptor-associated 31-like                                                                                                                                                                                               |
| 1133629                 | 6      | 0.098 ± 0.049    | 0.182 ± 0.008             | 0.238 ± 0.141              | Formate/nitrite transporter<br>Lipocalin                                                                                                                                                                                         |
| 1084143                 | 1      | 0.098 ± 0.013    | 0.043 ± 0.004             | 0.056 ± 0.001              | Tricalbin<br>C2 calcium/lipid-binding region, CaLB<br>C2 calcium-dependent membrane targeting                                                                                                                                    |
| 1113589                 | 11     | 0.097 ± 0.054    | 0.000 ± 0.000             | 0.061 ± 0.009              | Rh-like protein/ammonium transporter<br>Blood group Rhesus C/E and D polypeptide<br>Ammonium transporter                                                                                                                         |
| 1141872                 | 12     | 0.096 ± 0.023    | 0.072 ± 0.008             | 0.099 ± 0.012              | Amino acid/polyamine transporter I                                                                                                                                                                                               |

|         |    |               |               |               |                                                                                                                                                               |
|---------|----|---------------|---------------|---------------|---------------------------------------------------------------------------------------------------------------------------------------------------------------|
| 1121621 | 12 | 0.091 ± 0.010 | 0.119 ± 0.048 | 0.095 ± 0.035 | Major facilitator superfamily                                                                                                                                 |
| 1105147 | 14 | 0.089 ± 0.000 | 0.071 ± 0.020 | 0.117 ± 0.012 | Major facilitator superfamily MFS-1<br>ATP-dependent DNA ligase, conserved site                                                                               |
| 1107420 | 4  | 0.087 ± 0.004 | 0.030 ± 0.001 | 0.073 ± 0.001 | OST3/OST6<br>Thioredoxin-like fold<br>Protein of unknown function DUF1774, fungi                                                                              |
| 1141471 | 6  | 0.085 ± 0.015 | 0.051 ± 0.002 | 0.108 ± 0.004 | Major facilitator superfamily                                                                                                                                 |
| 1143598 | 10 | 0.064 ± 0.018 | 0.175 ± 0.024 | 0.000 ± 0.000 | Major facilitator superfamily                                                                                                                                 |
| 1144791 | 12 | 0.062 ± 0.012 | 0.000 ± 0.000 | 0.000 ± 0.000 | Major facilitator superfamily                                                                                                                                 |
| 1184281 | 1  | 0.061 ± 0.049 | 0.037 ± 0.003 | 0.110 ± 0.012 | Alkaline-phosphatase-like, core domain<br>Alkaline phosphatase                                                                                                |
| 1101809 | 10 | 0.048 ± 0.005 | 0.020 ± 0.003 | 0.000 ± 0.000 | Major facilitator superfamily<br>General substrate transporter<br>Sugar transporter, conserved site<br>Sugar transporter<br>MFS general substrate transporter |
| 1026385 | 12 | 0.047 ± 0.004 | 0.027 ± 0.001 | 0.056 ± 0.003 | Amino acid/polyamine transporter I<br><br>Amino acid permease-associated region<br>Amino acid permease subfamily                                              |
| 209668  | 2  | 0.046 ± 0.024 | 0.055 ± 0.022 | 0.082 ± 0.011 | -                                                                                                                                                             |
| 1177845 | 4  | 0.041 ± 0.032 | 0.098 ± 0.001 | 0.000 ± 0.000 | Shr3 amino acid permease chaperone                                                                                                                            |
| 1128338 | 9  | 0.037 ± 0.003 | 0.044 ± 0.000 | 0.065 ± 0.008 | Major facilitator superfamily MFS-1                                                                                                                           |
| 1141295 | 2  | 0.031 ± 0.014 | 0.033 ± 0.010 | 0.019 ± 0.002 | GOLD<br>emp24/gp25L/p24                                                                                                                                       |
| 1122987 | 1  | 0.030 ± 0.014 | 0.042 ± 0.012 | 0.071 ± 0.009 | Ribophorin I                                                                                                                                                  |
| 1148445 | 9  | 0.029 ± 0.003 | 0.000 ± 0.000 | 0.061 ± 0.014 | Protein of unknown function DUF250                                                                                                                            |
| 51992   | 15 | 0.028 ± 0.003 | 0.034 ± 0.004 | 0.022 ± 0.012 | Na <sup>+</sup> /solute symporter                                                                                                                             |
| 1186700 | 2  | 0.027 ± 0.003 | 0.016 ± 0.000 | 0.018 ± 0.005 | VPS10<br>BNR repeat                                                                                                                                           |
| 1142882 | 11 | 0.022 ± 0.005 | 0.045 ± 0.002 | 0.000 ± 0.000 | Major facilitator superfamily                                                                                                                                 |
| 1142864 | 1  | 0.022 ± 0.010 | 0.014 ± 0.001 | 0.019 ± 0.013 | -                                                                                                                                                             |

|         |    |               |               |               |                                                                                                                                                                                                                                                                                                                                                 |
|---------|----|---------------|---------------|---------------|-------------------------------------------------------------------------------------------------------------------------------------------------------------------------------------------------------------------------------------------------------------------------------------------------------------------------------------------------|
| 1098273 | 16 | 0.022 ± 0.006 | 0.027 ± 0.001 | 0.031 ± 0.004 | Glycosyl transferase, family 48                                                                                                                                                                                                                                                                                                                 |
| 44753   | 1  | 0.020 ± 0.007 | 0.000 ± 0.000 | 0.000 ± 0.000 | BAAT/Acyl-CoA thioester hydrolase C-terminal                                                                                                                                                                                                                                                                                                    |
| 1186946 | 5  | 0.019 ± 0.002 | 0.000 ± 0.000 | 0.026 ± 0.000 | Cystinosin/ERS1p repeat<br>Mannose-P-dolichol utilization defect 1 protein<br>Protein of unknown function DUF284, transmembrane eukaryotic                                                                                                                                                                                                      |
| 1019516 | 2  | 0.018 ± 0.001 | 0.000 ± 0.000 | 0.007 ± 0.003 | Cytochrome P450, E-class, group IV                                                                                                                                                                                                                                                                                                              |
| 1187492 | 2  | 0.018 ± 0.004 | 0.000 ± 0.000 | 0.011 ± 0.001 |                                                                                                                                                                                                                                                                                                                                                 |
| 1162850 | 1  | 0.016 ± 0.005 | 0.000 ± 0.000 | 0.000 ± 0.000 | Mannose-6-phosphate receptor, binding                                                                                                                                                                                                                                                                                                           |
| 1038787 | 1  | 0.014 ± 0.008 | 0.017 ± 0.001 | 0.027 ± 0.015 | Peptidase M28                                                                                                                                                                                                                                                                                                                                   |
| 1180715 | 13 | 0.013 ± 0.006 | 0.003 ± 0.000 | 0.019 ± 0.005 | Transferrin receptor-like, dimerisation<br>Protease-associated PA<br>Glycoside hydrolase, catalytic core<br>Glycosyl transferase, group 1<br>Starch synthase catalytic region<br>Glycosyl hydrolase, family 13, catalytic region<br>Glycosyl hydrolase, family 13, subfamily, catalytic region<br>Cation-dependent mannose-6-phosphate receptor |
| 202429  | 1  | 0.013 ± 0.001 | 0.000 0.000   | 0.011 ± 0.002 |                                                                                                                                                                                                                                                                                                                                                 |
| 1146541 | 3  | 0.012 ± 0.002 | 0.012 ± 0.002 | 0.011 ± 0.007 | Mannose-6-phosphate receptor, binding<br>Phosphatidic acid phosphatase type 2/haloperoxidase                                                                                                                                                                                                                                                    |
| 1112865 | 1  | 0.012 ± 0.001 | 0.008 ± 0.001 | 0.003 ± 0.000 | Cytochrome P450, E-class, group IV<br>P-II protein uridylation site<br>ERG4/ERG24 ergosterol biosynthesis protein                                                                                                                                                                                                                               |
| 1101638 | 9  | 0.011 ± 0.004 | 0.000 ± 0.000 | 0.000 ± 0.000 |                                                                                                                                                                                                                                                                                                                                                 |
| 1188093 | 9  | 0.011 ± 0.004 | 0.008 ± 0.001 | 0.008 ± 0.003 | Globin, subset<br>Histone H4                                                                                                                                                                                                                                                                                                                    |

|                         |       |               |               |               |                                                                                                                                                                                                      |
|-------------------------|-------|---------------|---------------|---------------|------------------------------------------------------------------------------------------------------------------------------------------------------------------------------------------------------|
|                         |       |               |               |               | Oxidoreductase FAD-binding region<br>Globin-like                                                                                                                                                     |
| 1160579                 | 9     | 0.011 ± 0.001 | 0.010 ± 0.003 | 0.008 ± 0.003 | ATPase, P-type,<br>K/Mg/Cd/Cu/Zn/Na/Ca/Na/H-transporter<br>ATPase, P-type cation-transporter, C-terminal<br>Calcium ATPase                                                                           |
| 1117429                 | 1     | 0.010 ± 0.003 | 0.000 ± 0.000 | 0.005 ± 0.000 | GOLD                                                                                                                                                                                                 |
| 1081653                 | 2     | 0.010 ± 0.001 | 0.000 ± 0.000 | 0.016 ± 0.000 | Cytochrome P450, E-class, group IV<br>Cytochrome P450                                                                                                                                                |
| 1141222;1143346;1153587 | 7;8;6 | 0.026 ± 0.002 | 0.024 ± 0.006 | 0.029 ± 0.005 | Legume lectin, beta domain<br>Chitin synthase<br>Chitin synthase N-terminal                                                                                                                          |
| 1107559                 | 1     | 0.008 ± 0.001 | 0.000 ± 0.000 | 0.022 ± 0.003 | Glycoside hydrolase, catalytic core                                                                                                                                                                  |
| 1116513                 | 12    | 0.008 ± 0.002 | 0.000 ± 0.000 | 0.005 ± 0.002 | Glycolipid anchored surface protein GAS1<br>Amino acid/polyamine transporter I<br>Amino acid permease, fungi<br>Amino acid permease, conserved site<br>ABC transporter, transmembrane region, type 1 |
| 1186153                 | 14    | 0.007 ± 0.001 | 0.003 ± 0.001 | 0.012 ± 0.000 |                                                                                                                                                                                                      |
| 41765                   | 11    | 0.007 ± 0.000 | 0.007 ± 0.005 | 0.009 ± 0.001 | Protein of unknown function DUF221<br>ERG4/ERG24 ergosterol biosynthesis                                                                                                                             |
| 1087119                 | 9     | 0.005 ± 0.003 | 0.005 ± 0.001 | 0.002 ± 0.000 | protein<br>Dienelactone hydrolase                                                                                                                                                                    |
| 1086577                 | 5     | 0.004 ± 0.001 | 0.000 ± 0.000 | 0.013 ± 0.004 | Cleft lip and palate transmembrane 1<br>TGF-beta receptor, type I/II extracellular region                                                                                                            |
| 1129336                 | 9     | 0.003 ± 0.000 | 0.005 ± 0.001 | 0.011 ± 0.000 |                                                                                                                                                                                                      |
| 1125334                 | 5     | 0.003 ± 0.002 | 0.005 ± 0.001 | 0.000 ± 0.000 | -                                                                                                                                                                                                    |
| 1160087                 | 14    | 0.003 ± 0.001 | 0.013 ± 0.000 | 0.014 ± 0.002 | Sterol-sensing 5TM box<br>Patched                                                                                                                                                                    |

|         |    |               |               |               |                                                   |
|---------|----|---------------|---------------|---------------|---------------------------------------------------|
|         |    |               |               |               | Aspartic acid and asparagine hydroxylation site   |
| 1189214 | 9  | 0.003 ± 0.000 | 0.000 ± 0.000 | 0.000 ± 0.000 | Major facilitator superfamily                     |
| 1158555 | 1  | 0.002 ± 0.001 | 0.000 ± 0.000 | 0.000 ± 0.000 | -                                                 |
| 1214584 | 1  | 0.001 ± 0.000 | 0.002 ± 0.000 | 0.000 ± 0.000 | Peptidase M28                                     |
| 1143191 | 12 | 0.000 ± 0.000 | 0.000 ± 0.000 | 0.000 ± 0.000 | Major facilitator superfamily                     |
| 1089440 | 7  | 0.000 ± 0.000 | 0.012 ± 0.001 | 0.000 ± 0.000 | Major facilitator superfamily MFS-1               |
| 1104422 | 14 | 0.000 ± 0.000 | 0.003 ± 0.001 | 0.000 ± 0.000 | ABC transporter, transmembrane region, type 1     |
| 1113000 | 8  | 0.000 ± 0.000 | 0.001 ± 0.000 | 0.006 ± 0.000 | Peptidase M28                                     |
|         |    |               |               |               | Leucine-rich repeat 2                             |
|         |    |               |               |               | Leucine-rich repeat, cysteine-containing subtype  |
| 1127869 | 13 | 0.000 ± 0.000 | 0.006 ± 0.000 | 0.000 ± 0.000 | Oligopeptide transporter OPT superfamily          |
| 1145364 | 3  | 0.000 ± 0.000 | 0.283 ± 0.064 | 0.000 ± 0.000 | TB2/DP1 and HVA22 related protein                 |
| 1185324 | 6  | 0.000 ± 0.000 | 0.045 ± 0.023 | 0.040 ± 0.012 | Major intrinsic protein                           |
| 1185987 | 11 | 0.000 ± 0.000 | 0.003 ± 0.001 | 0.002 ± 0.000 | -                                                 |
| 1188715 | 2  | 0.000 ± 0.000 | 0.003 ± 0.002 | 0.000 ± 0.000 | ABC transporter, transmembrane region, type 1     |
| 1022562 | 11 | 0.000 ± 0.000 | 0.000 ± 0.000 | 0.029 ± 0.002 | Protein of unknown function DUF250                |
| 1099906 | 5  | 0.000 ± 0.000 | 0.000 ± 0.000 | 0.002 ± 0.000 | Protein of unknown function DUF590                |
| 1111630 | 10 | 0.000 ± 0.000 | 0.000 ± 0.000 | 0.011 ± 0.001 | Major facilitator superfamily MFS-1               |
|         |    |               |               |               | TGF-beta receptor, type I/II extracellular region |
| 1118545 | 11 | 0.000 ± 0.000 | 0.000 ± 0.000 | 0.039 ± 0.011 | Major facilitator superfamily MFS-1               |
| 1124902 | 12 | 0.000 ± 0.000 | 0.000 ± 0.000 | 0.014 ± 0.004 | Major facilitator superfamily MFS-1               |
| 1146101 | 14 | 0.000 ± 0.000 | 0.000 ± 0.000 | 0.012 ± 0.009 | Major facilitator superfamily MFS-1               |
| 1156564 | 8  | 0.000 ± 0.000 | 0.000 ± 0.000 | 0.000 ± 0.000 | Glycoside hydrolase, catalytic core               |
|         |    |               |               |               | Amylo-alpha-1,6-glucosidase                       |
|         |    |               |               |               | Glycogen debranching enzyme                       |
|         |    |               |               |               | Six-hairpin glycosidase-like                      |
|         |    |               |               |               | Protein of unknown function DUF221                |
| 1175877 | 9  | 0.000 ± 0.000 | 0.000 ± 0.000 | 0.008 ± 0.002 | -                                                 |
| 1180703 | 12 | 0.000 ± 0.000 | 0.000 ± 0.000 | 0.014 ± 0.001 | Major facilitator superfamily                     |

|                                     |    |               |               |               |                                                                                                                     |
|-------------------------------------|----|---------------|---------------|---------------|---------------------------------------------------------------------------------------------------------------------|
| 1187342                             | 13 | 0.000 ± 0.000 | 0.000 ± 0.000 | 0.003 ± 0.001 | Glycoside hydrolase, catalytic core                                                                                 |
| 1188840                             | 12 | 0.000 ± 0.000 | 0.000 ± 0.000 | 0.030 ± 0.013 | Major facilitator superfamily MFS-1<br>Nitrate transporter                                                          |
| 1168100                             | 1  | 0.000 ± 0.000 | 0.000 ± 0.000 | 0.013 ± 0.003 | -                                                                                                                   |
| 1039419                             | 1  | 0.000 ± 0.000 | 0.000 ± 0.000 | 0.003 ± 0.000 | Octicosapeptide/Phox/Bem1p<br>Cystathionine beta-synthase, core<br>ABC transporter, transmembrane region,<br>type 1 |
| 1227231                             | 12 | 0.000 ± 0.000 | 0.000 ± 0.000 | 0.001 ± 0.000 | Calcium-binding EF-hand                                                                                             |
| 1166284                             | 5  | 0.000 ± 0.000 | 0.000 ± 0.000 | 0.001 ± 0.000 |                                                                                                                     |
| <b>Membrane bound mitochondrial</b> |    |               |               |               |                                                                                                                     |
| 1147568                             | 4  | 1.360 ± 0.317 | 1.372 ± 0.292 | 1.563 ± 0.244 | Mitochondrial carrier protein                                                                                       |
| 1103448                             | 1  | 0.455 ± 0.120 | 0.321 ± 0.099 | 0.381 ± 0.041 | Prohibitin<br>Band 7 protein                                                                                        |
| 1142070                             | 3  | 0.362 ± 0.047 | 0.633 ± 0.150 | 0.445 ± 0.072 | -<br>Ubiquinol-cytochrome C reductase,<br>UQCRX/QCR9-like                                                           |
| 1146906                             | 1  | 0.347 ± 0.016 | 0.495 ± 0.029 | 0.247 ± 0.007 | -                                                                                                                   |
| 1141403                             | 2  | 0.294 ± 0.102 | 0.564 ± 0.078 | 0.344 ± 0.102 | GRIM-19                                                                                                             |
| 1145529                             | 1  | 0.217 ± 0.060 | 0.144 ± 0.078 | 0.093 ± 0.013 | -                                                                                                                   |
| 1164228                             | 3  | 0.167 ± 0.119 | 0.167 ± 0.036 | 0.106 ± 0.016 | Protein of unknown function DUF543                                                                                  |
| 1179969                             | 1  | 0.166 ± 0.081 | 0.363 ± 0.003 | 0.192 ± 0.070 | Concanavalin A-like lectin/glucanase<br>Hypoxia induced protein conserved<br>region                                 |
| 1167367                             | 1  | 0.126 ± 0.005 | 0.050 ± 0.011 | 0.052 ± 0.005 | Mitochondrial carrier protein<br>Mitochondrial substrate carrier<br>Adenine nucleotide translocator 1               |
| 1148052                             | 3  | 0.123 ± 0.021 | 0.083 ± 0.025 | 0.096 ± 0.013 |                                                                                                                     |
| 1113466                             | 2  | 0.108 ± 0.021 | 0.082 ± 0.010 | 0.034 ± 0.003 | Mitochondrial import inner membrane<br>translocase, subunit Tim17/22                                                |
| 1148385                             | 3  | 0.073 ± 0.011 | 0.322 ± 0.007 | 0.144 ± 0.058 | Cytochrome P450, E-class, group I<br>Protein of unknown function UPF0136,<br>Transmembrane                          |
| 1112854                             | 2  | 0.066 ± 0.017 | 0.053 ± 0.014 | 0.053 ± 0.002 | Mpv17/PMP22                                                                                                         |
| 1104685                             | 3  | 0.059 ± 0.024 | 0.038 ± 0.010 | 0.054 ± 0.009 |                                                                                                                     |
| 1146802                             | 3  | 0.058 ± 0.019 | 0.000 ± 0.000 | 0.008 ± 0.004 |                                                                                                                     |

|         |   |               |               |               |                                                                                                                                                                      |
|---------|---|---------------|---------------|---------------|----------------------------------------------------------------------------------------------------------------------------------------------------------------------|
| 1211786 | 2 | 0.031 ± 0.017 | 0.005 ± 0.001 | 0.019 ± 0.000 | AMP-dependent synthetase and ligase                                                                                                                                  |
| 1143042 | 1 | 0.026 ± 0.001 | 0.006 ± 0.001 | 0.021 ± 0.004 | Ras GTPase                                                                                                                                                           |
| 1129330 | 2 | 0.021 ± 0.000 | 0.008 ± 0.000 | 0.010 ± 0.001 | Root hair defective 3 GTP-binding<br>Protein of unknown function DUF1772,<br>fungi                                                                                   |
| 1187028 | 4 | 0.014 ± 0.003 | 0.236 ± 0.053 | 0.158 ± 0.003 | AAA ATPase, conserved site                                                                                                                                           |
| 1126414 | 1 | 0.011 ± 0.001 | 0.000 ± 0.000 | 0.013 ± 0.002 | AAA ATPase, core<br>Peptidase M41, FtsH<br>Peptidase M41                                                                                                             |
| 1145516 | 1 | 0.010 ± 0.001 | 0.000 ± 0.000 | 0.005 ± 0.003 | Inorganic phosphate transport PHO88                                                                                                                                  |
| 1141800 | 1 | 0.051 ± 0.003 | 0.084 ± 0.006 | 0.059 ± 0.003 | Mitochondrial substrate carrier                                                                                                                                      |
| 213531  | 1 | 0.023 ± 0.003 | 0.021 ± 0.004 | 0.034 ± 0.010 | Protease inhibitor I4, serpin<br>Tetratricopeptide TPR2<br>Tetratricopeptide TPR-1<br>Tetratricopeptide region<br>Mitochondrial import translocase,<br>subunit Tom70 |
| 1186873 | 5 | 0.008 ± 0.003 | 0.012 ± 0.005 | 0.000 ± 0.000 | Insulin-induced                                                                                                                                                      |
| 1188148 | 1 | 0.005 ± 0.002 | 0.007 ± 0.000 | 0.009 ± 0.003 | Cytochrome P450, E-class, group IV                                                                                                                                   |
| 213721  | 3 | 0.005 ± 0.003 | 0.007 ± 0.001 | 0.005 ± 0.003 | EXS, C-terminal                                                                                                                                                      |
| 1139856 | 1 | 0.005 ± 0.002 | 0.000 ± 0.000 | 0.000 ± 0.000 | Alpha/beta hydrolase fold-1                                                                                                                                          |
| 1182144 | 1 | 0.003 ± 0.001 | 0.000 ± 0.000 | 0.000 ± 0.000 | -                                                                                                                                                                    |
| 1161772 | 1 | 0.003 ± 0.001 | 0.000 ± 0.000 | 0.000 ± 0.000 | Apc13p<br>Initiation factor 2B related                                                                                                                               |
| 1102272 | 1 | 0.001 ± 0.001 | 0.000 ± 0.000 | 0.001 ± 0.000 | Sel1-like                                                                                                                                                            |
| 1142582 | 1 | 0.000 ± 0.000 | 0.202 ± 0.040 | 0.197 ± 0.020 | -<br>Fungal transcriptional regulatory protein,<br>N-terminal                                                                                                        |
| 1183694 | 3 | 0.000 ± 0.000 | 0.003 ± 0.000 | 0.000 ± 0.000 | NAD(P)-binding                                                                                                                                                       |
| 1122081 | 1 | 0.000 ± 0.000 | 0.000 ± 0.000 | 0.005 ± 0.001 | Aspartate/homoserine dehydrogenase,<br>NAD-binding<br>Homoserine dehydrogenase, catalytic                                                                            |

|                          |    |               |               |               |                                                                                                                                                                                                                                 |
|--------------------------|----|---------------|---------------|---------------|---------------------------------------------------------------------------------------------------------------------------------------------------------------------------------------------------------------------------------|
| 1145832                  | 2  | 0.000 ± 0.000 | 0.000 ± 0.000 | 0.037 ± 0.000 | Microsomal signal peptidase 25 kDa subunit                                                                                                                                                                                      |
| 1148034                  | 2  | 0.000 ± 0.000 | 0.000 ± 0.000 | 0.036 ± 0.016 | -                                                                                                                                                                                                                               |
| <b>Membrane bound ER</b> |    |               |               |               |                                                                                                                                                                                                                                 |
| 1147042                  | 1  | 0.587 ± 0.047 | 0.833 ± 0.081 | 0.381 ± 0.064 | Cytochrome b5                                                                                                                                                                                                                   |
| 1030262                  | 10 | 0.334 ± 0.157 | 0.381 ± 0.002 | 0.121 ± 0.014 | SecY protein                                                                                                                                                                                                                    |
| 1148233                  | 1  | 0.183 ± 0.051 | 0.149 ± 0.007 | 0.219 ± 0.010 | FAD-binding, type 1<br>Flavodoxin-like<br>Oxidoreductase FAD/NAD(P)-binding<br>Flavoprotein pyridine nucleotide<br>cytochrome reductase<br>Flavodoxin/nitric oxide synthase<br>Cyclopropane-fatty-acyl-phospholipid<br>synthase |
| 1141865                  | 2  | 0.144 ± 0.047 | 0.057 ± 0.006 | 0.041 ± 0.006 | Cyclophilin-like                                                                                                                                                                                                                |
| 1126047                  | 2  | 0.134 ± 0.047 | 0.018 ± 0.000 | 0.046 ± 0.004 | Surface protein from Gram-positive cocci,<br>anchor region<br>Peptidyl-prolyl cis-trans isomerase,<br>cyclophilin-type                                                                                                          |
| 1111800                  | 1  | 0.133 ± 0.011 | 0.067 ± 0.015 | 0.059 ± 0.026 | Heat shock protein 70<br>Heat shock protein Hsp70                                                                                                                                                                               |
| 1161167                  | 15 | 0.116 ± 0.038 | 0.016 ± 0.011 | 0.113 ± 0.009 | Tetrapeptide transporter, OPT1/isp4                                                                                                                                                                                             |
| 1142917                  | 1  | 0.099 ± 0.030 | 0.085 ± 0.026 | 0.085 ± 0.004 | Oligopeptide transporter OPT superfamily<br>Terpenoid synthase                                                                                                                                                                  |
| 187424                   | 3  | 0.085 ± 0.023 | 0.035 ± 0.007 | 0.048 ± 0.003 | Farnesyl-diphosphate farnesyltransferase<br>Squalene/phytoene synthase                                                                                                                                                          |
| 1156469                  | 1  | 0.064 ± 0.002 | 0.228 ± 0.052 | 0.142 ± 0.014 | Defender against death DAD protein                                                                                                                                                                                              |
| 1022934                  | 7  | 0.052 ± 0.011 | 0.040 ± 0.011 | 0.038 ± 0.003 | ERG2 and sigma1 receptor-like                                                                                                                                                                                                   |
| 1126035                  | 5  | 0.041 ± 0.010 | 0.038 ± 0.016 | 0.045 ± 0.025 | GNS1/SUR4 membrane protein<br>Peptidase M48, Ste24p                                                                                                                                                                             |



|         |    |               |               |               |                                                                                                                                                                              |
|---------|----|---------------|---------------|---------------|------------------------------------------------------------------------------------------------------------------------------------------------------------------------------|
| 1129295 | 7  | 0.038 ± 0.014 | 0.051 ± 0.004 | 0.080 ± 0.001 | Peptidase M, neutral zinc metallopeptidases, zinc-binding site<br>Cytochrome c oxidase, subunit VIa<br>Surfeit locus 4-related<br>Surfeit locus 4                            |
| 1141391 | 5  | 0.035 ± 0.012 | 0.034 ± 0.010 | 0.028 ± 0.001 | ER lumen protein retaining receptor                                                                                                                                          |
| 1176663 | 13 | 0.032 ± 0.002 | 0.037 ± 0.000 | 0.035 ± 0.003 | Oligosaccharyl transferase, STT3 subunit                                                                                                                                     |
| 1150065 | 1  | 0.030 ± 0.004 | 0.004 ± 0.001 | 0.024 ± 0.004 | Heat shock protein 70                                                                                                                                                        |
| 1122380 | 10 | 0.022 ± 0.000 | 0.015 ± 0.005 | 0.019 ± 0.004 | E1-E2 ATPase-associated region<br><br>ATPase, P-type,<br>K/Mg/Cd/Cu/Zn/Na/Ca/Na/H-transporter<br>P-type ATPase of unknown pump<br>specificity (type V)                       |
| 1126550 | 6  | 0.020 ± 0.006 | 0.021 ± 0.007 | 0.032 ± 0.004 | Haloacid dehalogenase-like hydrolase<br>Cof protein<br>3-oxo-5-alpha-steroid 4-dehydrogenase,<br>C-terminal<br>Phosphotransferase system, HPr serine<br>phosphorylation site |
| 1112450 | 10 | 0.018 ± 0.001 | 0.014 ± 0.002 | 0.009 ± 0.006 | Glycosyl transferase, family 39<br>MIR motif<br>MIR                                                                                                                          |
| 1185951 | 17 | 0.016 ± 0.006 | 0.019 ± 0.006 | 0.052 ± 0.006 | Endonuclease/exonuclease/phosphatase<br>Inositolphosphorylceramide-B                                                                                                         |
| 1142806 | 3  | 0.016 ± 0.000 | 0.012 ± 0.008 | 0.037 ± 0.004 | hydroxylase<br>Cytochrome b5<br>Fatty acid hydroxylase                                                                                                                       |
| 1184388 | 7  | 0.015 ± 0.003 | 0.006 ± 0.000 | 0.009 ± 0.002 | ABC-2 type transporter<br>EGF-like, type 3<br>EGF, extracellular                                                                                                             |

|                 |       |               |               |               |                                                                                                                                                                                                                                |
|-----------------|-------|---------------|---------------|---------------|--------------------------------------------------------------------------------------------------------------------------------------------------------------------------------------------------------------------------------|
| 1142025         | 1     | 0.015 ± 0.005 | 0.013 ± 0.001 | 0.000 ± 0.000 | Peptidase S26A, signal peptidase I<br>Peptidase S24, S26A, S26B and S26C<br>Peptidase S26B, eukaryotic signal peptidase                                                                                                        |
| 1167021         | 2     | 0.013 ± 0.000 | 0.000 ± 0.000 | 0.015 ± 0.008 | Peptidase S24, S26A and S26B, C-terminal<br>Synaptojanin, N-terminal                                                                                                                                                           |
| 1128516         | 2     | 0.013 ± 0.002 | 0.017 ± 0.003 | 0.009 ± 0.000 | Cytochrome P450, E-class, group I<br>UDP-glucuronosyl/UDP-                                                                                                                                                                     |
| 1159100         | 1     | 0.013 ± 0.006 | 0.012 ± 0.003 | 0.018 ± 0.004 | glucosyltransferase<br>Short-chain dehydrogenase/reductase                                                                                                                                                                     |
| 1151842         | 3     | 0.012 ± 0.005 | 0.032 ± 0.004 | 0.023 ± 0.010 | SDR<br>Glucose/ribitol dehydrogenase<br>NAD(P)-binding                                                                                                                                                                         |
| 1087806         | 1     | 0.012 ± 0.001 | 0.004 ± 0.001 | 0.021 ± 0.002 | Glycosyl transferase, family 15                                                                                                                                                                                                |
| 1164538;1188786 | 10;11 | 0.021 ± 0.001 | 0.000 ± 0.000 | 0.026 ± 0.002 | Major facilitator superfamily MFS-1                                                                                                                                                                                            |
| 1165478         | 9     | 0.006 ± 0.001 | 0.002 ± 0.000 | 0.008 ± 0.001 | ALG6, ALG8 glycosyltransferase                                                                                                                                                                                                 |
| 1180885         | 1     | 0.006 ± 0.002 | 0.004 ± 0.001 | 0.009 ± 0.002 | Glycoside hydrolase, catalytic core<br>Glycoside hydrolase, family 31                                                                                                                                                          |
| 1119913         | 4     | 0.006 ± 0.003 | 0.000 ± 0.000 | 0.008 ± 0.001 | Calcium-binding EF-hand<br><br>Like-Sm ribonucleoprotein-related, core<br><br>Membrane protein, At2g17000, predicted<br>Mechanosensitive ion channel MscS                                                                      |
| 1212687         | 6     | 0.005 ± 0.001 | 0.000 ± 0.000 | 0.002 ± 0.001 | Hydroxymethylglutaryl-CoA reductase, class I/II, substrate-binding<br>Hydroxymethylglutaryl-CoA reductase, class I, catalytic<br>Ribosomal protein S2<br><br>Hydroxymethylglutaryl-CoA reductase, class I/II, NAD/NADP-binding |

|                             |    |               |               |               |  |                                                              |
|-----------------------------|----|---------------|---------------|---------------|--|--------------------------------------------------------------|
|                             |    |               |               |               |  | Sterol-sensing 5TM box                                       |
|                             |    |               |               |               |  | Hydroxymethylglutaryl-CoA reductase, class I/II, catalytic   |
| 1105077                     | 5  | 0.004 ± 0.003 | 0.011 ± 0.001 | 0.005 ± 0.001 |  | Spermine synthase                                            |
| 1184634                     | 9  | 0.003 ± 0.000 | 0.000 ± 0.000 | 0.000 ± 0.000 |  | Major facilitator superfamily                                |
| 1102309                     | 3  | 0.002 ± 0.001 | 0.005 ± 0.001 | 0.000 ± 0.000 |  | Sec63                                                        |
|                             |    |               |               |               |  | Heat shock protein DnaJ, N-terminal                          |
| 1126795                     | 11 | 0.000 ± 0.000 | 0.007 ± 0.001 | 0.006 ± 0.001 |  | ALG6, ALG8 glycosyltransferase                               |
| 1141396                     | 2  | 0.000 ± 0.000 | 0.001 ± 0.000 | 0.016 ± 0.007 |  | Sterol desaturase                                            |
| 1141926                     | 12 | 0.000 ± 0.000 | 0.007 ± 0.000 | 0.000 ± 0.000 |  | Tetrapeptide transporter, OPT1/isp4                          |
|                             |    |               |               |               |  | Translocation protein Sec62, ascomycota                      |
| 1164790                     | 2  | 0.000 ± 0.000 | 0.010 ± 0.001 | 0.000 ± 0.000 |  | Translocation protein Sec62                                  |
|                             |    |               |               |               |  | Protein of unknown function UPF0136, Transmembrane           |
| 1038793                     | 4  | 0.000 ± 0.000 | 0.000 ± 0.000 | 0.014 ± 0.004 |  | Cytochrome b5                                                |
| 1145703                     | 1  | 0.000 ± 0.000 | 0.000 ± 0.000 | 0.032 ± 0.011 |  | Major facilitator superfamily MFS-1                          |
| 1165706                     | 11 | 0.000 ± 0.000 | 0.000 ± 0.000 | 0.000 ± 0.000 |  | Flagellar basal body rod protein                             |
|                             |    |               |               |               |  | Fatty acid desaturase, type 1, core                          |
| 1173782                     | 3  | 0.000 ± 0.000 | 0.000 ± 0.000 | 0.022 ± 0.002 |  | Delta-9 acyl-CoA desaturase with haem/steroid binding region |
|                             |    |               |               |               |  | Fatty acid desaturase, type 1, C-terminal                    |
|                             |    |               |               |               |  | Fatty acid desaturase, type 1, N-terminal                    |
| 1178623                     | 11 | 0.000 ± 0.000 | 0.000 ± 0.000 | 0.047 ± 0.011 |  | Major facilitator superfamily MFS-1                          |
| 1180615                     | 12 | 0.000 ± 0.000 | 0.000 ± 0.000 | 0.015 ± 0.005 |  | Oligopeptide transporter OPT superfamily                     |
| 129462                      | 9  | 0.000 ± 0.000 | 0.000 ± 0.000 | 0.003 ± 0.000 |  | Alg9-like mannosyltransferase                                |
| <b>Membrane bound golgi</b> |    |               |               |               |  |                                                              |
| 1121885                     | 1  | 0.095 ± 0.005 | 0.054 ± 0.009 | 0.053 ± 0.012 |  | Thioredoxin domain                                           |
|                             |    |               |               |               |  | Thioredoxin-related                                          |
| 1145709                     | 4  | 0.035 ± 0.016 | 0.000 ± 0.000 | 0.000 ± 0.000 |  | -                                                            |

|                                |    |               |               |               |                                                                                                                                                                   |
|--------------------------------|----|---------------|---------------|---------------|-------------------------------------------------------------------------------------------------------------------------------------------------------------------|
| 1189177                        | 9  | 0.025 ± 0.005 | 0.023 ± 0.000 | 0.021 ± 0.001 | Nonaspanin (TM9SF)                                                                                                                                                |
| 1025773                        | 9  | 0.022 ± 0.004 | 0.011 ± 0.000 | 0.035 ± 0.001 | Protein of unknown function DUF250<br>UDP-galactose transporter                                                                                                   |
| 1134649                        | 1  | 0.022 ± 0.013 | 0.000 ± 0.000 | 0.008 ± 0.005 | Dolichyl-diphosphooligosaccharide-<br>protein glycosyltransferase 48kDa subunit                                                                                   |
| 1182240                        | 5  | 0.012 ± 0.009 | 0.014 ± 0.001 | 0.000 ± 0.000 | SNARE associated Golgi protein                                                                                                                                    |
| 1150734                        | 1  | 0.009 ± 0.005 | 0.034 ± 0.000 | 0.007 ± 0.001 | -                                                                                                                                                                 |
| 1169091                        | 7  | 0.006 ± 0.001 | 0.000 ± 0.000 | 0.000 ± 0.000 | Nucleotide-sugar transporter                                                                                                                                      |
| 1163105                        | 2  | 0.000 ± 0.000 | 0.004 ± 0.000 | 0.000 ± 0.000 | Cytochrome P450, E-class, group I                                                                                                                                 |
| 1157289                        | 1  | 0.000 ± 0.000 | 0.000 ± 0.000 | 0.000 ± 0.000 | Cytochrome P450, E-class, group I                                                                                                                                 |
| <b>Membrane bound vacuolar</b> |    |               |               |               |                                                                                                                                                                   |
| 1104971                        | 1  | 0.041 ± 0.005 | 0.040 ± 0.003 | 0.032 ± 0.005 | Protein of unknown function DUF1620<br>Pyrrolo-quinoline quinone<br>WD40 repeat-like<br>Quinonprotein alcohol dehydrogenase-<br>like                              |
| 1142522                        | 7  | 0.039 ± 0.037 | 0.000 ± 0.000 | 0.000 ± 0.000 | Iron permease FTR1                                                                                                                                                |
| 1167192                        | 6  | 0.035 ± 0.003 | 0.131 ± 0.009 | 0.130 ± 0.013 | ATPase, V0/A0 complex, 116-kDa subunit                                                                                                                            |
| 1122202                        | 13 | 0.009 ± 0.001 | 0.000 ± 0.000 | 0.005 ± 0.003 | Major facilitator superfamily MFS-1<br>Major facilitator superfamily<br>Tetracycline resistance protein, TetB<br>ABC transporter, transmembrane region,<br>type 1 |
| 1093419                        | 12 | 0.004 ± 0.002 | 0.001 ± 0.000 | 0.001 ± 0.001 | AAA+ ATPase, core<br>ABC transporter-like                                                                                                                         |
| 1080879                        | 12 | 0.000 ± 0.000 | 0.000 ± 0.000 | 0.020 ± 0.001 | ABC transporter, transmembrane region<br>Citrate synthase-like, core<br>Amino acid/polyamine transporter I                                                        |
| 1208596                        | 3  | 0.000 ± 0.000 | 0.000 ± 0.000 | 0.002 ± 0.000 | SPX, N-terminal                                                                                                                                                   |

|                                                |   |               |               |               |                                                                                                   |
|------------------------------------------------|---|---------------|---------------|---------------|---------------------------------------------------------------------------------------------------|
| <b>Membrane bound lysosomal</b>                |   |               |               |               |                                                                                                   |
| 1100508                                        | 7 | 0.027 ± 0.003 | 0.011 ± 0.001 | 0.010 ± 0.007 | Transmembrane receptor, eukaryota                                                                 |
| <b>Membrane bound extracellular (secreted)</b> |   |               |               |               |                                                                                                   |
| 1034818                                        | 1 | 0.009 ± 0.002 | 0.007 ± 0.001 | 0.000 ± 0.000 | -                                                                                                 |
| 1139200                                        | 1 | 0.000 ± 0.000 | 0.031 ± 0.009 | 0.000 ± 0.000 | -                                                                                                 |
| 1145281                                        | 1 | 0.000 ± 0.000 | 0.000 ± 0.000 | 0.145 ± 0.084 | NADH-ubiquinone oxidoreductase B12 subunit                                                        |
| <b>Mitochondrial - with targeting sequence</b> |   |               |               |               |                                                                                                   |
| 1141664                                        | 1 | 0.856 ± 0.081 | 1.836 ± 0.108 | 1.898 ± 0.373 | Cytochrome c oxidase subunit IV                                                                   |
| 1101772                                        | 1 | 0.597 ± 0.104 | 0.258 ± 0.049 | 0.356 ± 0.056 | Concanavalin A-like lectin/glucanase<br>Calreticulin/calnexin<br>Calreticulin/calnexin, P         |
| 1098376                                        | 1 | 0.316 ± 0.019 | 0.134 ± 0.031 | 0.195 ± 0.045 | FAD dependent oxidoreductase<br>FAD-dependent glycerol-3-phosphate dehydrogenase                  |
| 1147204                                        | 1 | 0.251 ± 0.212 | 0.033 ± 0.007 | 0.027 ± 0.009 | -                                                                                                 |
| 209689                                         | 1 | 0.137 ± 0.005 | 0.236 ± 0.021 | 0.097 ± 0.011 | -                                                                                                 |
| 1146585                                        | 4 | 0.130 ± 0.052 | 0.283 ± 0.067 | 0.039 ± 0.007 | -                                                                                                 |
| 1125366                                        | 4 | 0.054 ± 0.007 | 0.038 ± 0.005 | 0.044 ± 0.012 | FAD dependent oxidoreductase<br>Aromatic-ring hydroxylase<br>Squalene epoxidase                   |
| 1143198                                        | 1 | 0.050 ± 0.022 | 0.085 ± 0.049 | 0.055 ± 0.016 | Protein of unknown function UPF0041                                                               |
| 1144353                                        | 9 | 0.034 ± 0.001 | 0.024 ± 0.012 | 0.036 ± 0.001 | Glycosyl transferase, family 39<br>EGF-like region, conserved site<br>Lipase, active site         |
| 1143907                                        | 2 | 0.031 ± 0.009 | 0.035 ± 0.004 | 0.000 ± 0.000 | Succinate dehydrogenase, cytochrome b subunit<br>Succinate dehydrogenase, cytochrome b556 subunit |

|         |    |               |               |               |                                                                                                                                                                    |
|---------|----|---------------|---------------|---------------|--------------------------------------------------------------------------------------------------------------------------------------------------------------------|
| 1179837 | 1  | 0.028 ± 0.005 | 0.031 ± 0.005 | 0.042 ± 0.006 | Nucleoside phosphatase GDA1/CD39                                                                                                                                   |
| 1176655 | 10 | 0.027 ± 0.001 | 0.000 ± 0.000 | 0.004 ± 0.001 | Glycosyl transferase, family 39                                                                                                                                    |
| 1184291 | 6  | 0.025 ± 0.015 | 0.029 ± 0.007 | 0.047 ± 0.016 | -                                                                                                                                                                  |
| 1144427 | 1  | 0.024 ± 0.011 | 0.000 ± 0.000 | 0.000 ± 0.000 | -                                                                                                                                                                  |
| 1146026 | 1  | 0.023 ± 0.002 | 0.031 ± 0.006 | 0.017 ± 0.002 | -                                                                                                                                                                  |
| 1038150 | 1  | 0.016 ± 0.012 | 0.000 ± 0.000 | 0.000 ± 0.000 | Glycosyl transferase, family 15                                                                                                                                    |
| 1144049 | 4  | 0.016 ± 0.006 | 0.023 ± 0.010 | 0.008 ± 0.002 | -                                                                                                                                                                  |
| 1142370 | 2  | 0.015 ± 0.001 | 0.012 ± 0.004 | 0.011 ± 0.001 | Mitochondrial import protein Pam17<br>N-acetylglucosaminyl                                                                                                         |
| 1084241 | 1  | 0.013 ± 0.003 | 0.000 ± 0.000 | 0.000 ± 0.000 | phosphatidylinositol deacetylase                                                                                                                                   |
| 1158534 | 1  | 0.013 ± 0.004 | 0.000 ± 0.000 | 0.000 ± 0.000 | Thioredoxin-like fold<br>Copper chaperone SCO1/SenC<br>Synthesis of cytochrome c oxidase,<br>Sco1/Sco2                                                             |
| 1226708 | 1  | 0.012 ± 0.000 | 0.000 ± 0.000 | 0.007 ± 0.000 | Glycoside hydrolase, family 47                                                                                                                                     |
| 1090476 | 4  | 0.012 ± 0.002 | 0.011 ± 0.002 | 0.012 ± 0.000 | Der1-like                                                                                                                                                          |
| 1162283 | 2  | 0.011 ± 0.002 | 0.015 ± 0.002 | 0.007 ± 0.001 | Protein of unknown function DUF1692                                                                                                                                |
| 1114338 | 6  | 0.008 ± 0.000 | 0.021 ± 0.002 | 0.031 ± 0.006 | -                                                                                                                                                                  |
| 1127980 | 1  | 0.008 ± 0.005 | 0.005 ± 0.000 | 0.009 ± 0.002 | FAD-dependent pyridine nucleotide-<br>disulphide oxidoreductase<br>Calcium-binding EF-hand<br>Pyridine nucleotide-disulphide<br>oxidoreductase, NAD-binding region |
| 1164910 | 2  | 0.006 ± 0.000 | 0.009 ± 0.001 | 0.000 ± 0.000 | -                                                                                                                                                                  |
| 1174618 | 6  | 0.005 ± 0.001 | 0.000 ± 0.000 | 0.007 ± 0.001 | DEK C terminal<br>Myosin head, motor region<br>Major intrinsic protein<br>Fungal chitin synthase<br>RNA polymerase sigma factor 54,<br>interaction                 |
| 1100035 | 3  | 0.002 ± 0.000 | 0.000 ± 0.000 | 0.000 ± 0.000 | -                                                                                                                                                                  |
| 1176977 | 1  | 0.002 ± 0.000 | 0.000 ± 0.000 | 0.000 ± 0.000 | -                                                                                                                                                                  |
| 1164300 | 17 | 0.001 ± 0.000 | 0.000 ± 0.000 | 0.000 ± 0.000 | ABC transporter, transmembrane region,<br>type 1                                                                                                                   |

|                                              |    |                    |               |               |                                                                                     |
|----------------------------------------------|----|--------------------|---------------|---------------|-------------------------------------------------------------------------------------|
| 1110430                                      | 11 | 0.000 ± 0.000      | 0.009 ± 0.003 | 0.006 ± 0.000 | Amino acid transporter, transmembrane ABC transporter, transmembrane region, type 1 |
| 1129829                                      | 4  | 0.000 ± 0.000      | 0.007 ± 0.003 | 0.000 ± 0.000 |                                                                                     |
| 1142998                                      | 1  | 0.000 ± 0.000      | 0.077 ± 0.049 | 0.077 ± 0.047 | -                                                                                   |
| 1144677                                      | 1  | 0.000 ± 0.000      | 0.131 ± 0.002 | 0.087 ± 0.001 | -                                                                                   |
| 1156944                                      | 7  | 0.000 ± 0.000      | 0.016 ± 0.005 | 0.014 ± 0.002 | -                                                                                   |
| 1148070                                      | 4  | 0.000 ± 0.000<br>± | 0.000 ± 0.000 | 0.007 ± 0.004 | Fatty acid desaturase, type 1, N-terminal<br>Fatty acid desaturase, type 1          |
| 1174341                                      | 8  | 0.000 ± 0.000      | 0.000 ± 0.000 | 0.012 ± 0.001 | Phosphatidate cytidyltransferase, eukaryota<br>Phosphatidate cytidyltransferase     |
| 1187508                                      | 8  | 0.000 ± 0.000      | 0.000 ± 0.000 | 0.012 ± 0.000 | Cytochrome oxidase assembly                                                         |
| 1187906                                      | 2  | 0.000 ± 0.000      | 0.000 ± 0.000 | 0.007 ± 0.001 | Surfeit locus 1                                                                     |
| <b>Mitochondrial - no targeting sequence</b> |    |                    |               |               |                                                                                     |
| 1182982                                      | 2  | 0.016 ± 0.004      | 0.000 ± 0.000 | 0.000 ± 0.000 | -                                                                                   |
| 1124805                                      | 1  | 0.009 ± 0.005      | 0.000 ± 0.000 | 0.015 ± 0.007 | -                                                                                   |
| <b>Endoplasmic reticulum (ER)</b>            |    |                    |               |               |                                                                                     |
| 1186974                                      | 4  | 0.011 ± 0.007      | 0.000 ± 0.000 | 0.000 ± 0.000 | -                                                                                   |
| <b>Golgi</b>                                 |    |                    |               |               |                                                                                     |
| 1141641                                      | 1  | 0.021 ± 0.005      | 0.000 ± 0.000 | 0.017 ± 0.004 | Glycosyl transferase, family 15                                                     |
| 1126561                                      | 1  | 0.007 ± 0.001      | 0.017 ± 0.001 | 0.009 ± 0.001 | Target SNARE coiled-coil region<br>Vesicle transport v-SNARE                        |
| <b>Nuclear</b>                               |    |                    |               |               |                                                                                     |
| 1144574                                      | 1  | 0.079 ± 0.019      | 0.020 ± 0.009 | 0.088 ± 0.016 | Concanavalin A-like lectin/glucanase<br>Legume-like lectin                          |
| <b>Cytoplasmic</b>                           |    |                    |               |               |                                                                                     |
| 1091575                                      | 2  | 0.055 ± 0.001      | 0.023 ± 0.003 | 0.030 ± 0.010 | -                                                                                   |

|                                 |   |               |               |               |                                                                |
|---------------------------------|---|---------------|---------------|---------------|----------------------------------------------------------------|
| 1161479                         | 1 | 0.016 ± 0.007 | 0.007 ± 0.004 | 0.049 ± 0.008 | Amidohydrolase 1                                               |
| 1137546                         | 2 | 0.005 ± 0.003 | 0.000 ± 0.000 | 0.000 ± 0.000 | Metal-dependent hydrolase, composite<br>Metallophosphoesterase |
| <b>Extracellular (secreted)</b> |   |               |               |               |                                                                |
| 1135869                         | 1 | 0.100 ± 0.029 | 0.076 ± 0.042 | 0.071 ± 0.038 | Ribosomal protein L13                                          |
| 1041322                         | 1 | 0.012 ± 0.005 | 0.000 ± 0.000 | 0.008 ± 0.003 | -                                                              |
| 1178906                         | 1 | 0.008 ± 0.004 | 0.000 ± 0.000 | 0.000 ± 0.000 | -                                                              |

---
