# Supplementary material for: Aspergillus niger membrane-associated proteome analysis for the identification of glucose transporters
Source: PubMed Central journal article supplement (PMC4574540; doi:10.1186/s13068-015-0317-9), 2015-09-17
Supplement: 13068_2015_317_MOESM5_ESM.pdf [file 13068_2015_317_MOESM5_ESM.pdf]

|                                         | sorbitol         | sorbitol + 1mM<br>glucose | sorbitol + 60mM<br>glucose |
|-----------------------------------------|------------------|---------------------------|----------------------------|
|                                         | rel. ab ± sd [%] | rel. ab ± sd [%]          | rel. ab ± sd [%]           |
| Plasma membrane                         | 3.773 ± 0.648    | 4.100 ± 0.618             | 3.482 ± 0.786              |
| Membrane bound mitochondrial            | 4.199 ± 1.020    | 5.279 ± 0.952             | 4.420 ± 0.730              |
| Membrane bound ER                       | 2.334 ± 0.555    | 2.287 ± 0.295             | 1.952 ± 0.290              |
| Membrane bound golgi                    | 0.225 ± 0.058    | 0.140 ± 0.011             | 0.125 ± 0.019              |
| Membrane bound vacuolar                 | 0.128 ± 0.048    | 0.172 ± 0.012             | 0.190 ± 0.023              |
| Membrane bound lysosomal                | 0.027 ± 0.003    | 0.011 ± 0.001             | 0.010 ± 0.007              |
| Membrane bound extracellular (secreted) | 0.009 ± 0.002    | 0.038 ± 0.011             | 0.145 ± 0.084              |
| Mitochondrial - with targeting sequence | 2.723 ± 0.582    | 3.389 ± 0.453             | 3.171 ± 0.627              |
| Mitochondrial - no targeting sequence   | 0.025 ± 0.009    | 0 ± 0                     | 0.015 ± 0.007              |
| Endoplasmatic reticulum (ER)            | 0.011 ± 0.007    | 0 ± 0                     | 0 ± 0                      |
| Golgi                                   | 0.028 ± 0.006    | 0.017 ± 0.001             | 0.026 ± 0.006              |
| Nuclear                                 | 0.079 ± 0.019    | 0.020 ± 0.009             | 0.088 ± 0.016              |
| Cytoplasmic                             | 0.076 ± 0.011    | 0.030 ± 0.007             | 0.079 ± 0.018              |
| Extracellular (secreted)                | 0.119 ± 0.038    | 0.076 ± 0.042             | 0.079 ± 0.042              |
