# Supplementary material for: Aspergillus niger membrane-associated proteome analysis for the identification of glucose transporters
Source: PubMed Central journal article supplement (PMC4574540; doi:10.1186/s13068-015-0317-9), 2015-09-17

## Growth of *S. cerevisiae* EBY.VW4000 expressing the *A. niger* *mstG* and *mstH* genes, at different glucose concentrations

The diagram shows glucose consumption profiles and growth curves of *mstG* and *mstH* expressing transformants growing in minimal medium with different glucose concentrations (2.5 mM, 10 mM and 50 mM). Results presented are the mean of three independent experiments.

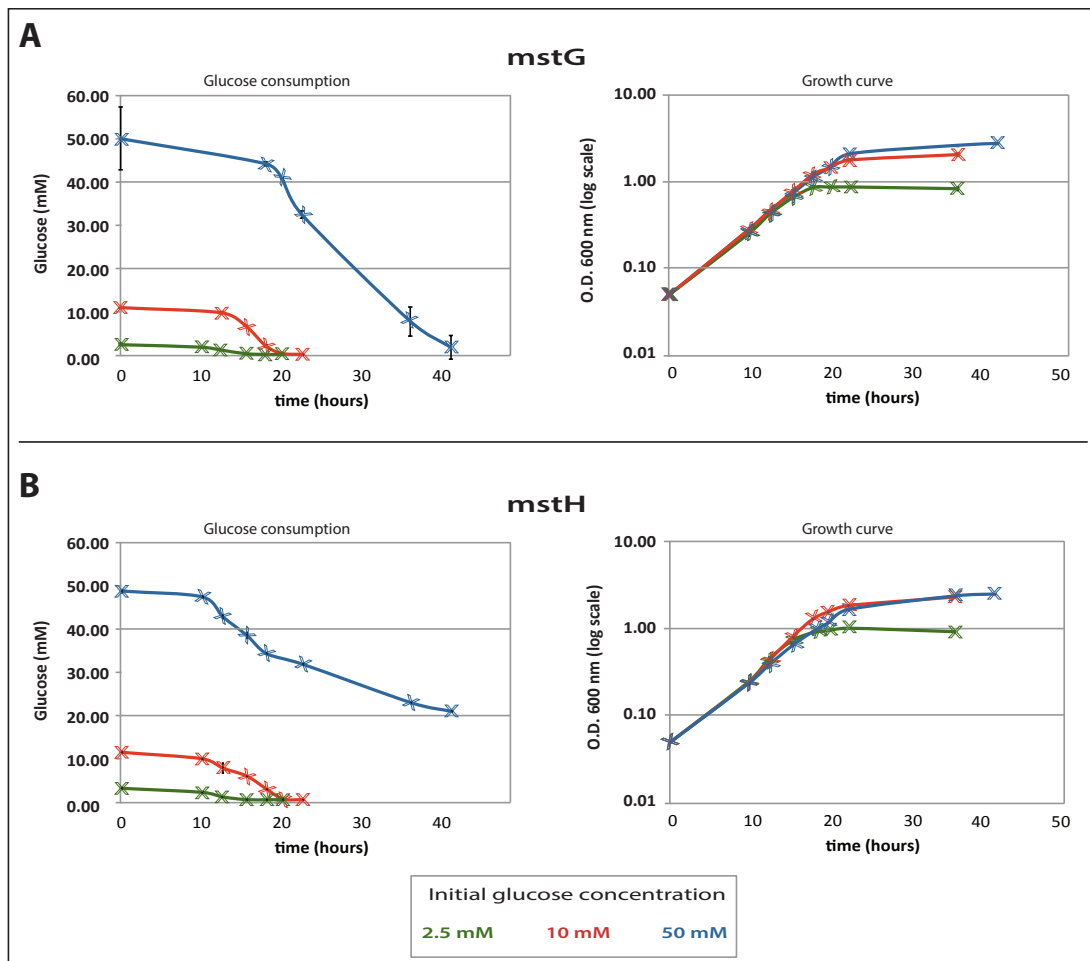

Supplement: 13068_2015_317_MOESM6_ESM.pdf [file 13068_2015_317_MOESM6_ESM.pdf]
